# Supplementary material for: Genetic and Functional Studies Implicate Synaptic Overgrowth and Ring Gland cAMP/PKA Signaling Defects in the Drosophila melanogaster Neurofibromatosis-1 Growth Deficiency
Source: PubMed Central journal article supplement (PMC3836801; doi:10.1371/journal.pgen.1003958), 2013-11-21
Supplement: pgen.1003958.s004.pdf [file pgen.1003958.s004.pdf]

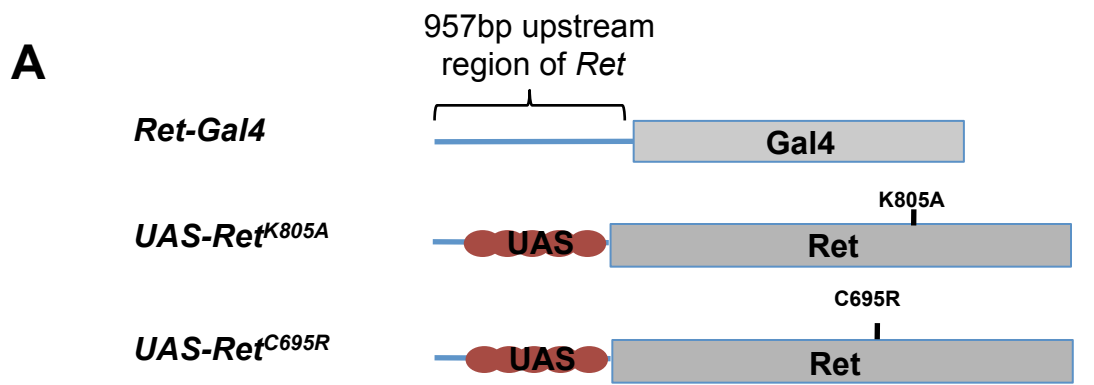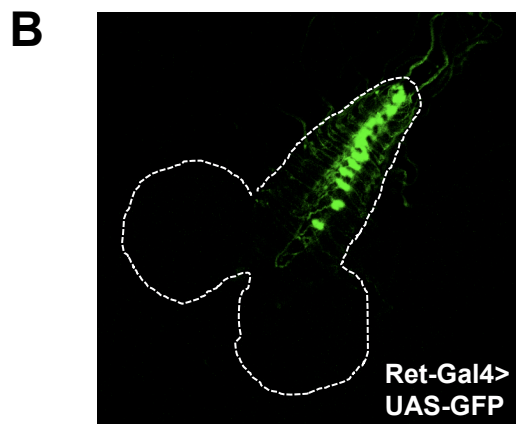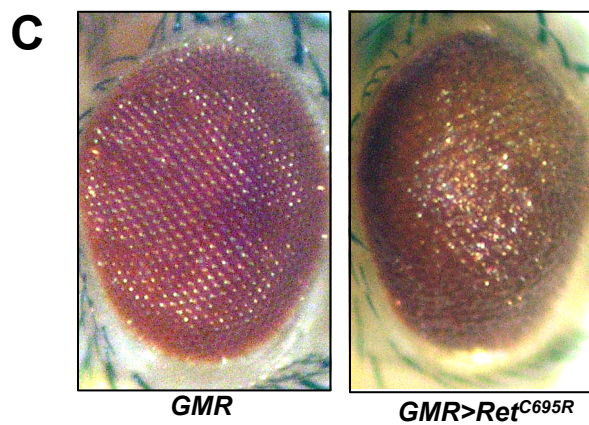

**D**

| <i>Gal4</i>     | <i>dNf1</i>     |                                                  | <i>WT</i>                      |                                |
|-----------------|-----------------|--------------------------------------------------|--------------------------------|--------------------------------|
|                 | <i>UAS-dNf1</i> | <i>UAS-Ret<sup>RNAi</sup><br/>v843 or v12116</i> | <i>UAS-Ret<sup>K805A</sup></i> | <i>UAS-Ret<sup>C695R</sup></i> |
| <i>Ras2(41)</i> | R               | NR                                               | NR                             | Small size Phenocopy           |
| <i>elav</i>     | R               | NR                                               | NR                             | Small size Phenocopy           |
| <i>Ret</i>      | NR              | NR                                               | NR                             | No size phenocopy              |

Figure S4
