# Supplementary material for: Genetic and Functional Studies Implicate Synaptic Overgrowth and Ring Gland cAMP/PKA Signaling Defects in the Drosophila melanogaster Neurofibromatosis-1 Growth Deficiency
Source: PubMed Central journal article supplement (PMC3836801; doi:10.1371/journal.pgen.1003958), 2013-11-21
Supplement: pgen.1003958.s005.pdf [file pgen.1003958.s005.pdf]

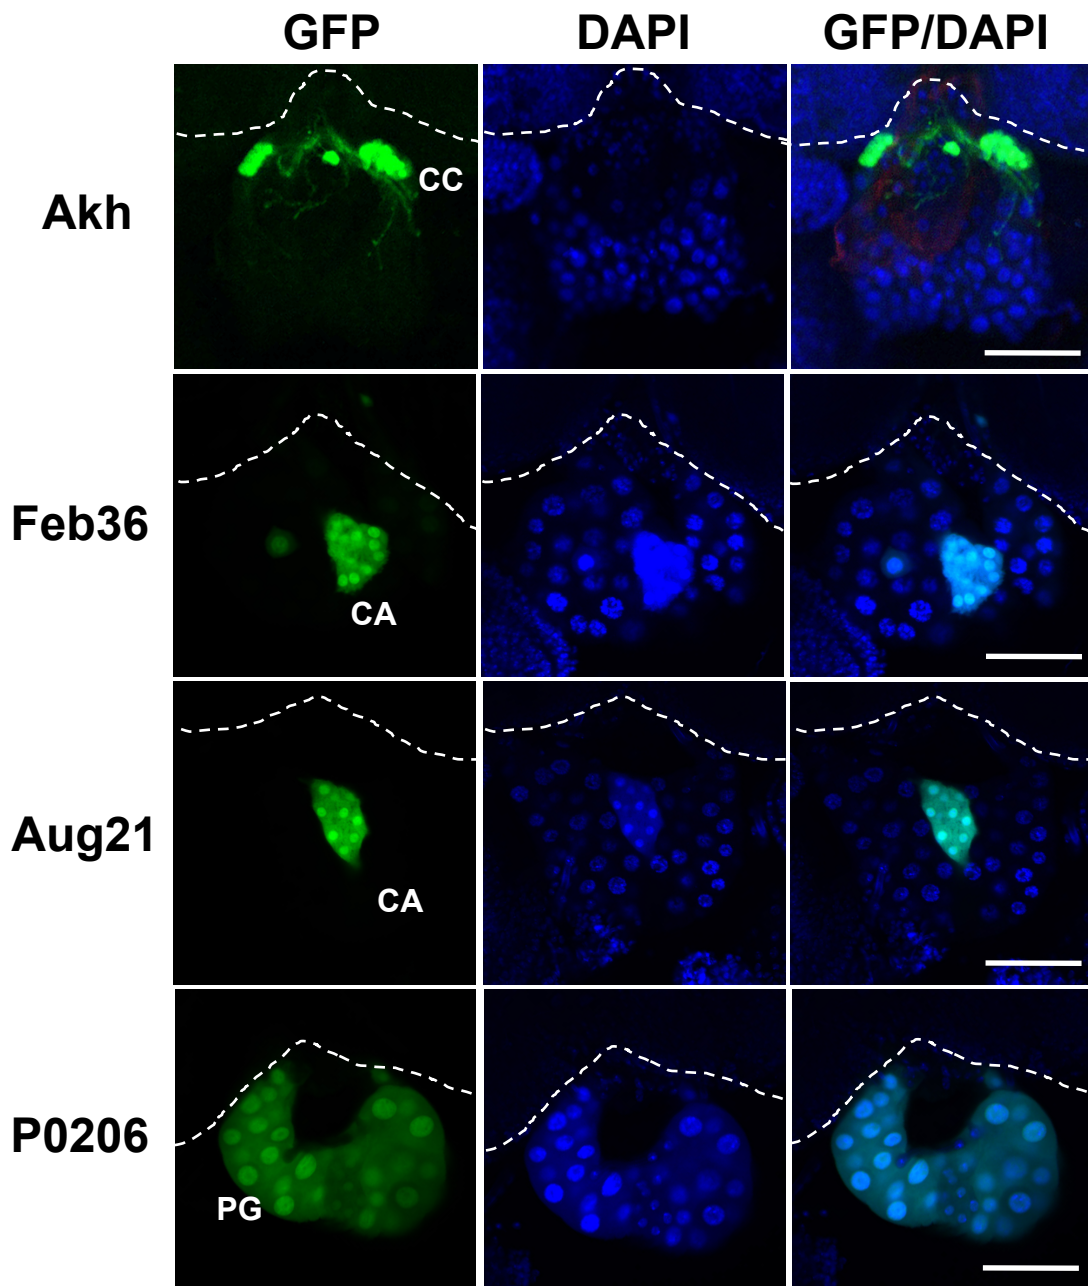

Figure S5
