# Supplementary material for: Genetic and Functional Studies Implicate Synaptic Overgrowth and Ring Gland cAMP/PKA Signaling Defects in the Drosophila melanogaster Neurofibromatosis-1 Growth Deficiency
Source: PubMed Central journal article supplement (PMC3836801; doi:10.1371/journal.pgen.1003958), 2013-11-21
Supplement: pgen.1003958.s009.pdf [file pgen.1003958.s009.pdf]

**Table S1.** Excluded deficiencies

| Deficiency           | Bloomington Stock | Breakpoints            | Coordinate start | Coordinate end | Reason Discarded                  |
|----------------------|-------------------|------------------------|------------------|----------------|-----------------------------------|
| <b>Chromosome 1</b>  |                   |                        |                  |                |                                   |
| Df(1)BSC662          | 26514             | 7D6;7F1                | 8010281          | 8383646        | Impossible                        |
| Df(1)BSC766          | 26863             | 11E9;12A7              | 13195231         | 13485587       | Minute                            |
| Df(1)Exel6245        | 7718              | 11E11;11F4             | 13213906         | 13305678       | Minute                            |
| Df(1)BSC714          | 26566             | 13E14;14A8             | 15652384         | 15980061       | Impossible                        |
| Df(1)FDD-0230186     | 27408             | 14C1;14E1              | 16268326         | 16420365       | Minute                            |
| Df(1)FDD-0230908     | 23296             | 14C6;14E1              | 16336383         | 16420365       | Minute                            |
| Df(1)Exel7463        | 7761              | 17C2;17D3              | 18428598         | 18635466       | Minute                            |
| Df(1)ED7413          | 8037              | 17D1;17F1              | 18551286         | 18757770       | Minute                            |
| Df(1)ED7424          | 9350              | 17D1;18C1              | 18551286         | 19192806       | Minute                            |
| Df(1)Exel6253        | 7721              | 18D13;18F2             | 19557049         | 19682746       | Minute                            |
| <b>Chromosome 2L</b> |                   |                        |                  |                |                                   |
| Df(2L)ED62           | 8937              | 21D1;21E2              | 480873           | 826788         | Sick stock                        |
| Df(2L)Exel7011       | 7783              | 22E1;22F3              | 2362917          | 2492447        | Impossible                        |
| Df(2L)BSC692         | 26544             | 23B3;23B7              | 2830265          | 2868633        | Minute                            |
| Df(2L)BSC692         | 26544             | 23B3;23B7              | 2830265          | 2868633        | Minute                            |
| Df(2L)BSC292         | 23677             | 23F6;24A2              | 3515462          | 3632008        | Impossible                        |
| Df(2L)BSC217         | 9694              | 24D8;24F1; 23D1;26C1-2 | 4197799          | 4403405        | Minute                            |
| Df(2L)ED250          | 9270              | 24F4;25A7              | 4477085          | 4821294        | Impossible                        |
| Df(2L)BSC52          | 8471              | 25A1--3;25B6--8        | 4577825          | 4971244        | Impossible                        |
| Df(2L)ED270          | 8039              | 25F2;25F5              | 5658629          | 5800196        | Long pupal phenotype in wild type |
| Df(2L)ED320          | 8902              | 25F2;26B2              | 5658629          | 5999643        | Long pupal phenotype in wild type |
| Df(2L)ED279          | 9271              | 25F2;26A1              | 5658629          | 5907456        | Long pupal phenotype in wild type |
| Df(2L)ED334          | 9343              | 25F2;26B2              | 5658629          | 5999667        | Long pupal phenotype in wild type |
| Df(2L)ED623          | 8930              | 29C1;29E4              | 8403564          | 8700124        | Impossible                        |
| Df(2L)ED776          | 7418              | 33E4;34A3              | 12434538         | 12975028       | Sick stock                        |
| Df(2L)ED777          | 7419              | 33E7;34A3              | 12484452         | 12975028       | Sick stock in NF1 <sup>E2</sup>   |
| Df(2L)ED784          | 7421              | 34A4;34B6              | 13004448         | 13332060       | Sick stock in NF1 <sup>E2</sup>   |
| Df(2L)BSC159         | 9594              | 34B4;34C4; 32F;35B1-2  | 13290761         | 13536086       | Minute                            |
| Df(2L)BSC812         | 27383             | 34B11;34E1             | 13421556         | 13878659       | Impossible                        |
| Df(2L)ED1102         | 24113             | 35F12;36A10            | 16350236         | 16684883       | Sick stock in NF1 <sup>E2</sup>   |
| Df(2L)Exel8038       | 7840              | 36E5;36F5              | 18123514         | 18455586       | Minute                            |

|                      |       |                    |          |          |                                 |
|----------------------|-------|--------------------|----------|----------|---------------------------------|
| Df(2L)ED1196         | 24115 | 36E6;37B1          | 18151698 | 18823590 | Minute                          |
| Df(2L)ED1317         | 9175  | 38D1;38F5          | 20638580 | 20917519 | Sick stock in NF1 <sup>E2</sup> |
| <b>Chromosome 2R</b> |       |                    |          |          |                                 |
| Df(2R)ED1484         | 9683  | 42A2;42A14         | 1781142  | 2132933  | Impossible                      |
| Df(2R)ED1612         | 8045  | 42A13;42E6         | 2108037  | 2937177  | Impossible                      |
| Df(2R)ED1770         | 9157  | 44D5;45B4          | 4543134  | 5095046  | Sick stock                      |
| Df(2R)BSC298         | 23682 | 46B2;46C7          | 5621779  | 5845625  | Sick stock                      |
| Df(2R)ED2098         | 9277  | 47A7;47C6          | 6304366  | 6786711  | Sick stock                      |
| Df(2R)ED2076         | 8909  | 47A10;47C1         | 6364289  | 6707491  | Impossible                      |
| Df(2R)BSC153         | 9540  | 48C1;48D7          | 7566603  | 7907386  | Impossible                      |
| Df(2R)BSC361         | 24385 | 50C3;50F1          | 9648768  | 10179666 | Minute                          |
| Df(2R)BSC134         | 9496  | 50E1;50E6;49A;51EF | 10063602 | 10153306 | Minute                          |
| Df(2R)BSC357         | 24381 | 50F6;51C1          | 10251391 | 10601192 | Impossible                      |
| Df(2R)Exel7144       | 7888  | 53C8;53D2          | 12459438 | 12578579 | Minute                          |
| Df(2R)ED3181         | 9213  | 53C9;53F10         | 12471454 | 12996322 | Minute                          |
| Df(2R)ED1            | 6916  | 53E4;53F8          | 12914232 | 12984827 | Sick stock                      |
| Df(2R)Exel7162       | 7896  | 56F11;56F16        | 16132691 | 16201140 | Minute                          |
| Df(2R)BSC462         | 24966 | 57B5;57C8          | 16862884 | 17068495 | Sick stock                      |
| Df(2R)BSC598         | 25431 | 58F3;59A1          | 18529284 | 18566186 | Minute                          |
| Df(2R)BSC602         | 25435 | 60C8;60E5          | 20320443 | 20815875 | Sick stock in NF1 <sup>E2</sup> |

Listed deficiencies were excluded for the reasons indicated. Deficiencies that failed to produce screening stocks are labeled 'Impossible'. Unhealthy (sick) deficiencies or those that uncovered *Minute* mutations were also excluded.
