# Supplementary material for: Genetic and Functional Studies Implicate Synaptic Overgrowth and Ring Gland cAMP/PKA Signaling Defects in the Drosophila melanogaster Neurofibromatosis-1 Growth Deficiency
Source: PubMed Central journal article supplement (PMC3836801; doi:10.1371/journal.pgen.1003958), 2013-11-21
Supplement: pgen.1003958.s010.pdf [file pgen.1003958.s010.pdf]

**Table S2. *dNf1* modifier deficiency screen results**

| Deficiency               | Stock # | Breakpoints | Coord start | Coord end | Modification     | Non-Specific Dominant Effect in WT | Pupal length (mm) | st dev | P value  | n= | Gene(s) Implicated | Notes                     |
|--------------------------|---------|-------------|-------------|-----------|------------------|------------------------------------|-------------------|--------|----------|----|--------------------|---------------------------|
| <i>w</i> <sup>1118</sup> |         |             |             |           |                  |                                    | 3.22              | 0.10   |          | 39 |                    |                           |
| NF1 <sup>E2</sup>        |         |             |             |           |                  |                                    | 2.81              | 0.09   |          | 50 |                    |                           |
| <b>Chromosome 1</b>      |         |             |             |           |                  |                                    |                   |        |          |    |                    |                           |
| Df(1)BSC843              | 27887   | 1A1;1A3     | 149001      | 228718    | NO               |                                    |                   |        |          |    |                    |                           |
| Df(1)BSC530              | 25058   | 1A5;1B12    | 258383      | 517610    | NO               |                                    |                   |        |          |    |                    | discrepancy with Exel6221 |
| Df(1)Exel6221            | 7699    | 1B4;1B8     | 364776      | 417700    | SUPPRESSOR       | No*                                | 2.96              | 0.10   | 8.35E-06 | 21 | elav               |                           |
| Df(1)ED6396              | 9052    | 1B5;1B8     | 387562      | 417663    | SUPPRESSOR       | No*                                | 3.05              | 0.10   | 1.00E-08 | 29 | elav               |                           |
| Df(1)ED6443              | 9053    | 1B14;1E1    | 550056      | 920740    | NO               |                                    |                   |        |          |    |                    | discrepancy with Exel6223 |
| Df(1)Exel6223            | 7700    | 1C4;1D2     | 664015      | 803283    | SUPPRESSOR       | No                                 | 2.90              | 0.10   | 0.000402 | 20 |                    |                           |
| Df(1)ED404               | 8030    | 1D2;1E3     | 828975      | 1029478   | NO               |                                    |                   |        |          |    |                    |                           |
| Df(1)Exel6225            | 7702    | 1D4;1E3     | 880096      | 1029014   | NO               |                                    |                   |        |          |    |                    | viable deficiency         |
| Df(1)Exel6226            | 7703    | 1E3;1F3     | 1028260     | 1216410   | NO               |                                    |                   |        |          |    |                    |                           |
| Df(1)ED6521              | 9281    | 1E3;1F4     | 1029306     | 1248009   | NO               |                                    |                   |        |          |    |                    |                           |
| Df(1)Exel6227            | 7704    | 1F3;2B1     | 1216410     | 1372852   | NO               |                                    |                   |        |          |    |                    |                           |
| Df(1)BSC719              | 26571   | 2A3;2B13    | 1347763     | 1759742   | SUPPRESSOR       | No                                 | 3.01              | 0.06   | 8.08E-07 | 10 | dor                |                           |
| Df(1)Exel8196            | 7769    | 2B1;2B5     | 1372852     | 1563287   | SUPPRESSOR       | No*                                | 3.09              | 0.13   | 7.26E-07 | 15 | dor                |                           |
| Df(1)BSC589              | 25423   | 2B3;2B9     | 1507482     | 1666569   | SUPPRESSOR       | No                                 | 2.98              | 0.11   | 9.36E-07 | 11 | dor                |                           |
| Df(1)BSC590              | 25424   | 2B16;2E1    | 1834029     | 2088496   | NO               |                                    |                   |        |          |    |                    |                           |
| Df(1)ED409               | 8950    | 2C7;2F5     | 1936260     | 2211664   | NO               |                                    |                   |        |          |    |                    |                           |
| Df(1)BSC570              | 25113   | 2C10;2E1    | 1967289     | 2088496   | NO               |                                    |                   |        |          |    |                    |                           |
| Df(1)ED6574              | 9054    | 2E1;3A2     | 2078663     | 2281799   | NO               |                                    |                   |        |          |    |                    |                           |
| Df(1)ED11354             | 9345    | 2F6;3A4     | 2219975     | 2411834   | NO               |                                    |                   |        |          |    |                    |                           |
| Df(1)Exel6230            | 7705    | 3A2;3A4     | 2281605     | 2439696   | SUP/non-specific | Yes                                | 3.00              | 0.11   | 3.64E-06 | 14 |                    |                           |
| Df(1)Exel6231            | 7706    | 3A2;3A3     | 2281787     | 2363334   | SUPPRESSOR       | No                                 | 2.89              | 0.07   | 3.82E-05 | 25 |                    |                           |
| Df(1)ED411               | 8031    | 3A3;3A8     | 2363892     | 2536719   | NO               |                                    |                   |        |          |    |                    |                           |
| Df(1)ED6579              | 9518    | 3A6;3A8     | 2483243     | 2536719   | NO               |                                    |                   |        |          |    |                    |                           |
| Df(1)ED6584              | 9348    | 3A8;3B1     | 2530246     | 2579468   | NO               |                                    |                   |        |          |    |                    |                           |
| Df(1)BSC710              | 26562   | 3B2;3C9     | 2597988     | 3070426   | SUPPRESSOR       | No                                 | 2.90              | 0.11   | 2.84E-06 | 19 | dunce              |                           |
| Df(1)BSC656              | 26508   | 3B3;3D2     | 2620587     | 3266975   | SUPPRESSOR       | No                                 | n/d               |        |          |    | dunce              |                           |
| Df(1)BSC834              | 27886   | 3C11;3F3    | 3182989     | 3739760   | SUPPRESSOR       | No                                 | 2.99              | 0.14   | 6.05E-05 | 15 | dunce              |                           |
| Df(1)Exel6233            | 7707    | 3D2;3D4     | 3266994     | 3379720   | NO               |                                    |                   |        |          |    |                    |                           |
| Df(1)ED6712              | 9169    | 3D3;3F1     | 3326568     | 3683648   | NO               |                                    |                   |        |          |    |                    |                           |

|               |       |           |          |          |                  |     |      |      |          |    |           |                           |  |
|---------------|-------|-----------|----------|----------|------------------|-----|------|------|----------|----|-----------|---------------------------|--|
| Df(1)ED6716   | 24145 | 3F3;4B4   | 3693229  | 4098617  | NO               |     |      |      |          |    |           |                           |  |
| Df(1)BSC723   | 26575 | 4B6;4C7   | 4212091  | 4427231  | SUPPRESSOR       | n/d | 2.90 | 0.10 | 7.84E-05 | 26 |           |                           |  |
| Df(1)BSC657   | 26509 | 4B6;4C10  | 4218814  | 4530440  | SUPPRESSOR       | No  | 2.93 | 0.10 | 5.03E-06 | 23 |           |                           |  |
| Df(1)BSC532   | 25060 | 4C1;4D2   | 4255593  | 4703149  | SUP/non-specific | Yes | 2.91 | 0.07 | 7.31E-08 | 27 |           |                           |  |
| Df(1)BSC823   | 27584 | 4F4;4F5   | 5176614  | 5226804  | SUPPRESSOR       | No  | 2.99 | 0.10 | 5.78E-09 | 25 |           |                           |  |
| Df(1)BSC533   | 25061 | 4F4;4F10  | 5176614  | 5322576  | SUPPRESSOR       | n/d | 2.89 | 0.09 | 0.000603 | 20 | NAAT1     |                           |  |
| Df(1)Exel6290 | 7753  | 4F7;4F10  | 5258565  | 5322576  | SUPPRESSOR       | No  | 2.87 | 0.10 | 0.004605 | 24 | NAAT1     |                           |  |
| Df(1)Exel6234 | 7708  | 4F10;5A2  | 5322576  | 5410644  | SUPPRESSOR       | n/d | 2.99 | 0.08 | 1.34E-08 | 18 |           | viaible deficiency        |  |
| Df(1)Exel6235 | 7709  | 5A2;5A6   | 5410644  | 5487999  | NO               |     |      |      |          |    |           |                           |  |
| Df(1)BSC571   | 25114 | 5A4;5A10  | 5439592  | 5556820  | NO               |     |      |      |          |    |           |                           |  |
| Df(1)ED6802   | 8949  | 5A12;5D1  | 5574013  | 5859913  | SUPPRESSOR       | No  | 2.98 | 0.09 | 2.33E-06 | 16 |           |                           |  |
| Df(1)Exel6236 | 7710  | 5A12;5C2  | 5574020  | 5664594  | NO               |     |      |      |          |    |           |                           |  |
| Df(1)Exel6237 | 7711  | 5C2;5C6   | 5664594  | 5786823  | SUPPRESSOR       | No  | 2.92 | 0.09 | 1.66E-08 | 45 |           |                           |  |
| Df(1)ED418    | 8032  | 5C7;5E4   | 5795722  | 6173434  | NO               |     |      |      |          |    |           |                           |  |
| Df(1)ED6829   | 8947  | 5C7;5F3   | 5796009  | 6247128  | NO               |     |      |      |          |    |           |                           |  |
| Df(1)Exel6238 | 7712  | 5D3;5D3   | 5963027  | 6162626  | NO               |     |      |      |          |    |           |                           |  |
| Df(1)BSC640   | 25730 | 5E1;5E7   | 6108371  | 6197982  | NO               |     |      |      |          |    |           |                           |  |
| Df(1)Exel6239 | 7713  | 5F2;6B1-2 | 6238366  | 6432046  | NO               |     |      |      |          |    |           |                           |  |
| Df(1)Exel6240 | 7714  | 6B2;6C4   | 6437996  | 6563891  | NO               |     |      |      |          |    |           |                           |  |
| Df(1)BSC351   | 24375 | 6C11;6D7  | 6642420  | 6754786  | NO               |     |      |      |          |    |           |                           |  |
| Df(1)ED6878   | 9625  | 6C12;6D8  | 6653326  | 6756981  | NO               |     |      |      |          |    |           |                           |  |
| Df(1)BSC867   | 29990 | 6E4;6F1   | 6875892  | 6935548  | NO               |     |      |      |          |    |           |                           |  |
| Df(1)ED6906   | 8955  | 7A3;7B2   | 7089117  | 7299839  | NO               |     |      |      |          |    |           |                           |  |
| Df(1)BSC536   | 25064 | 7B2;7C1   | 7232686  | 7785646  | SUPPRESSOR       | No  | 2.96 | 0.08 | 9.67E-09 | 23 |           |                           |  |
| Df(1)BSC763   | 26860 | 7B2;7B6   | 7329413  | 7586928  | SUPPRESSOR       | No  | 2.99 | 0.10 | 2.77E-06 | 14 |           |                           |  |
| Df(1)BSC866   | 29989 | 7D5;7D16  | 7981026  | 8051355  | SUPPRESSOR       | No  | 2.91 | 0.10 | 0.000414 | 18 |           |                           |  |
| Df(1)BSC627   | 25702 | 7F7;8B4   | 8486318  | 8764152  | NO               |     |      |      |          |    |           | discrepancy with Exel6241 |  |
| Df(1)Exel6241 | 7715  | 8A2;8B2   | 8603854  | 8700609  | SUPPRESSOR       | No* | 2.93 | 0.07 | 3.36E-09 | 28 |           |                           |  |
| Df(1)ED6957   | 8033  | 8B6;8C13  | 8785828  | 9029070  | NO               |     |      |      |          |    |           |                           |  |
| Df(1)BSC663   | 26515 | 8D1;8D5   | 9111380  | 9178608  | SUP/non-specific | Yes | 3.09 | 0.08 | 1.56E-16 | 27 | Dsor1/amx |                           |  |
| Df(1)Exel9049 | 7770  | 8D2;8D3   | 9141146  | 9146199  | SUPPRESSOR       | No* | 2.92 | 0.07 | 1.42E-08 | 26 | Dsor1/amx |                           |  |
| Df(1)BSC712   | 26564 | 8F1;9B1   | 9500628  | 9980459  | NO               |     |      |      |          |    |           |                           |  |
| Df(1)ED6989   | 9056  | 8F9;9B1   | 9580686  | 9964506  | NO               |     |      |      |          |    |           |                           |  |
| Df(1)ED6991   | 9216  | 8F9;9B4   | 9580686  | 10105557 | NO               |     |      |      |          |    |           |                           |  |
| Df(1)ED7005   | 9153  | 9B1;9D3   | 9965955  | 10479464 | NO               |     |      |      |          |    |           |                           |  |
| Df(1)BSC755   | 26853 | 9C4;9F5   | 10349012 | 10742506 | SUPPRESSOR       | No  | 2.95 | 0.07 | 1.2E-06  | 16 |           |                           |  |
| Df(1)ED429    | 8034  | 9D3;9D3   | 10440897 | 10479464 | NO               |     |      |      |          |    |           | viaible deficiency        |  |
| Df(1)ED7010   | 9057  | 9D3;9D4   | 10440903 | 10523340 | NO               |     |      |      |          |    |           |                           |  |
| Df(1)BSC704   | 26556 | 9E4;9F13  | 10651741 | 10858005 | NO               |     |      |      |          |    |           |                           |  |

|                  |       |            |          |          |                  |     |      |      |          |    |  |                         |
|------------------|-------|------------|----------|----------|------------------|-----|------|------|----------|----|--|-------------------------|
| Df(1)BSC540      | 25068 | 9E8;10A3   | 10666578 | 10959043 | SUP/non-specific | Yes | 2.88 | 0.08 | 4.3E-05  | 29 |  |                         |
| Df(1)BSC572      | 25391 | 9F8;10A3   | 10784973 | 10986286 | SUPPRESSOR       | No  | 2.99 | 0.09 | 1.04E-07 | 18 |  |                         |
| Df(1)BSC658      | 26510 | 10B3;10C10 | 11220142 | 11495012 | SUPPRESSOR       | No  | 2.98 | 0.14 | 0.002014 | 10 |  |                         |
| Df(1)ED7067      | 9154  | 10B8;10C10 | 11284071 | 11495030 | NO               |     |      |      |          |    |  |                         |
| Df(1)BSC876      | 30581 | 10C7;10F7  | 11466244 | 11815319 | NO               |     |      |      |          |    |  |                         |
| Df(1)Exel6242    | 7716  | 10D1;10D7  | 11516418 | 11609816 | NO               |     |      |      |          |    |  |                         |
| Df(1)Exel9050    | 7759  | 10D5;10D5  | 11589014 | 11600755 | NO               |     |      |      |          |    |  | viable deficiency       |
| Df(1)ED7147      | 9171  | 10D6;11A1  | 11608416 | 11898833 | NO               |     |      |      |          |    |  |                         |
| Df(1)ED7161      | 9217  | 11A1;11B14 | 11901120 | 12644899 | NO               |     |      |      |          |    |  |                         |
| Df(1)ED7153      | 8953  | 11A1;11B1  | 11901120 | 12461493 | NO               |     |      |      |          |    |  |                         |
| Df(1)Exel6244    | 7717  | 11A11;11B1 | 12357618 | 12441984 | NO               |     |      |      |          |    |  |                         |
| Df(1)BSC624      | 25699 | 11B1;11D10 | 12440392 | 12990292 | NO               |     |      |      |          |    |  |                         |
| Df(1)ED7170      | 8898  | 11B15;11E8 | 12646635 | 13171359 | NO               |     |      |      |          |    |  |                         |
| Df(1)ED7165      | 9058  | 11B15;11E1 | 12646635 | 13032981 | NO               |     |      |      |          |    |  |                         |
| Df(1)BSC545      | 25073 | 11C2;11E5  | 12679143 | 13117045 | NO               |     |      |      |          |    |  |                         |
| Df(1)ED7217      | 8952  | 12A9;12C6  | 13536116 | 13716354 | NO               |     |      |      |          |    |  | discrepancy with BSC546 |
| Df(1)BSC546      | 25074 | 12B4;12B4  | 13612398 | 13641431 | SUPPRESSOR       | No  | 2.93 | 0.09 | 8.38E-07 | 24 |  |                         |
| Df(1)BSC705      | 26557 | 12D1;12E9  | 13880813 | 14334444 | SUPPRESSOR       | No  | 2.96 | 0.08 | 2.41E-08 | 20 |  |                         |
| Df(1)BSC628      | 25703 | 12E3;12E7  | 14087266 | 14166904 | SUPPRESSOR       | No  | 2.93 | 0.08 | 4.34E-07 | 25 |  |                         |
| Df(1)ED7229      | 9352  | 12E5;12F2  | 14116267 | 14547977 | ENHANCER         | No  | 2.68 | 0.09 | 1.27E-06 | 20 |  |                         |
| Df(1)ED7261      | 9218  | 12F2;12F5  | 14547842 | 14733445 | NO               |     |      |      |          |    |  |                         |
| Df(1)Exel6248    | 7719  | 12F4;13A1  | 14720026 | 14817700 | NO               |     |      |      |          |    |  |                         |
| Df(1)ED7265      | 9414  | 12F4;13A5  | 14720102 | 14901940 | NO               |     |      |      |          |    |  |                         |
| Df(1)BSC310      | 24336 | 12F5;13A10 | 14736446 | 14983589 | SUPPRESSOR       | No  | 2.90 | 0.09 | 4.26E-05 | 26 |  |                         |
| Df(1)ED7289      | 29732 | 13A5;13A12 | 14918810 | 15019783 | ENH/non-specific | Yes | 2.67 | 0.09 | 4.67E-06 | 18 |  |                         |
| Df(1)ED7294      | 8035  | 13B1;13C3  | 15069448 | 15344331 | SUPPRESSOR       | No* | 2.87 | 0.11 | 0.00463  | 23 |  |                         |
| Df(1)BSC706      | 26558 | 13B6;13C5  | 15222417 | 15378825 | SUPPRESSOR       | No  | 2.93 | 0.12 | 0.000233 | 22 |  |                         |
| Df(1)ED7331      | 9219  | 13C3;13F1  | 15344288 | 15707556 | NO               |     |      |      |          |    |  |                         |
| Df(1)ED7344      | 9220  | 13E1;13F17 | 15520480 | 15762174 | NO               |     |      |      |          |    |  |                         |
| Df(1)BSC756      | 27344 | 13E14;13F1 | 15652384 | 15708694 | NO               |     |      |      |          |    |  |                         |
| Df(1)Exel6251    | 7720  | 13F1;13F17 | 15698387 | 15761875 | SUPPRESSOR       | n/d | 3.07 | 0.12 | 2.95E-09 | 18 |  |                         |
| Df(1)ED7355      | 8899  | 14A8;14B7  | 15985520 | 16172450 | NO               |     |      |      |          |    |  |                         |
| Df(1)ED7364      | 9905  | 14A8;14C6  | 15985520 | 16340978 | NO               |     |      |      |          |    |  |                         |
| Df(1)BSC761      | 26858 | 14D1;14F1  | 16357189 | 16487738 | NO               |     |      |      |          |    |  |                         |
| Df(1)BSC760      | 26857 | 14E1;14F2  | 16420365 | 16526135 | NO               |     |      |      |          |    |  |                         |
| Df(1)FDD-0172933 | 27413 | 15A1;15A11 | 16574754 | 16730272 | NO               |     |      |      |          |    |  |                         |
| Df(1)BSC582      | 25416 | 15A1;15E2  | 16574754 | 16985866 | SUPPRESSOR       | No  | 2.93 | 0.11 | 3.73E-08 | 15 |  |                         |
| Df(1)BSC581      | 25415 | 15A3;15B1  | 16599184 | 16739816 | SUPPRESSOR       | No  | 2.97 | 0.09 | 1.27E-06 | 14 |  |                         |
| Df(1)FDD-0210114 | 27414 | 15A3;15A11 | 16618543 | 16730272 | NO               |     |      |      |          |    |  |                         |

|                      |       |            |          |          |                  |     |      |      |          |    |            |                               |
|----------------------|-------|------------|----------|----------|------------------|-----|------|------|----------|----|------------|-------------------------------|
| Df(1)BSC725          | 26577 | 15A3;15A11 | 16638453 | 16731508 | SUPPRESSOR       | No  | 2.98 | 0.10 | 1.34E-06 | 18 |            |                               |
| Df(1)BSC583          | 25417 | 15F1;16B10 | 17056914 | 17525354 | SUPPRESSOR       | n/d | 3.04 | 0.10 | 2.1E-10  | 23 |            |                               |
| Df(1)BSC853          | 27924 | 15F4;16B4  | 17126100 | 17455865 | SUPPRESSOR       | No  | 2.95 | 0.09 | 1.27E-08 | 25 |            |                               |
| Df(1)BSC584          | 25418 | 15F4;16A1  | 17126100 | 17185722 | NO               |     |      |      |          |    |            |                               |
| Df(1)BSC641          | 25731 | 15F9;16E1  | 17185780 | 17738503 | NO               |     |      |      |          |    |            |                               |
| Df(1)BSC643          | 25733 | 15F9;16F1  | 17185780 | 17801269 | NO               |     |      |      |          |    |            |                               |
| Df(1)BSC647          | 25737 | 16C1;16F6  | 17605502 | 17957208 | NO               |     |      |      |          |    |            |                               |
| Df(1)BSC405          | 24429 | 16D5;16F6  | 17724792 | 17986865 | NO               |     |      |      |          |    |            |                               |
| Df(1)ED13478         | 29733 | 16F6;16F7  | 17979439 | 17996044 | NO               |     |      |      |          |    |            |                               |
| Df(1)BSC352          | 24376 | 16F7;17A8  | 18011500 | 18268918 | SUP/non-specific | Yes | 2.98 | 0.07 | 2.42E-10 | 21 |            |                               |
| Df(1)ED447           | 8036  | 17C1;17F1  | 18400974 | 18757770 | SUPPRESSOR       | No* | 2.97 | 0.10 | 1.66E-05 | 15 | CCKLR-17D1 |                               |
| Df(1)Exel9051        | 7762  | 17D1;17D3  | 18586964 | 18635466 | SUPPRESSOR       | No  | 2.96 | 0.10 | 1.29E-06 | 20 | CCKLR-17D1 | viable deficiency             |
| Df(1)Exel7464        | 7764  | 17D1;17E1  | 18586964 | 18725228 | SUPPRESSOR       | No  | 2.94 | 0.06 | 1.91E-08 | 18 | CCKLR-17D1 | viable deficiency             |
| Df(1)Exel7465        | 7766  | 17D6;17F2  | 18694300 | 18793210 | NO               |     |      |      |          |    |            |                               |
| Df(1)Exel6291        | 7754  | 18A2;18A2  | 18922751 | 19047666 | SUPPRESSOR       | No* | 2.96 | 0.09 | 8.67E-08 | 22 |            | viable deficiency             |
| Df(1)ED7441          | 8951  | 18A3;18C2  | 19047666 | 19216140 | NO               |     |      |      |          |    |            |                               |
| Df(1)Exel9068        | 7767  | 18B4;18B6  | 19136043 | 19154050 | SUPPRESSOR       | No  | 2.96 | 0.09 | 2.41E-08 | 30 | Hs3st-B    | viable deficiency             |
| Df(1)Exel7468        | 7768  | 18B7;18C8  | 19158545 | 19403670 | NO               |     |      |      |          |    |            |                               |
| Df(1)BSC275          | 23171 | 18C8;18D3  | 19390722 | 19474112 | SUPPRESSOR       | No  | 2.92 | 0.11 | 5.06E-05 | 25 | car        |                               |
| Df(1)BSC871          | 29994 | 18D7;18F2  | 19511634 | 19682746 | NO               |     |      |      |          |    |            |                               |
| Df(1)BSC870          | 29993 | 18E1;18F3  | 19584121 | 19742393 | NO               |     |      |      |          |    |            |                               |
| Df(1)ED7635          | 9351  | 19A2;19C1  | 19781188 | 20059902 | NO               |     |      |      |          |    |            |                               |
| Df(1)BSC645          | 25735 | 19C4;19E2  | 20201432 | 20617464 | NO               |     |      |      |          |    |            |                               |
| Df(1)BSC646          | 25736 | 19C4;19E4  | 20201432 | 20764608 | ENHANCER         | No  | 2.72 | 0.11 | 0.001475 | 18 |            |                               |
| Df(1)Exel6254        | 7722  | 19C4;19D1  | 20201559 | 20339410 | SUPPRESSOR       | No* | 2.99 | 0.08 | 4.24E-13 | 28 | HERC2      |                               |
| Df(1)BSC626          | 25701 | 19E1;19F4  | 20528438 | 21200049 | SUPPRESSOR       | No  | 2.92 | 0.08 | 1.02E-06 | 22 |            |                               |
| Df(1)BSC708          | 26560 | 19E7;20A4  | 20899323 | 21494893 | SUPPRESSOR       | No  | 2.94 | 0.08 | 2.1E-10  | 30 |            |                               |
| Df(1)ED7664          | 9172  | 19F1;19F6  | 20994656 | 21245032 | NO               |     |      |      |          |    |            |                               |
| Df(1)BSC588          | 25422 | 19F3;20A4  | 21152369 | 21465331 | NO               |     |      |      |          |    |            |                               |
| Df(1)Exel6255        | 7723  | 20A1;20C1  | 21390230 | 21919501 | SUPPRESSOR       | No  | 2.85 | 0.09 | 9.00E-12 | 23 |            |                               |
| Df(1)ED12432         | 9156  | 20C3;20D2  | 21961362 | 22059220 | ENH/non-specific | Yes | 2.65 | 0.10 | 0.001475 | 17 |            | viable deficiency and acc dev |
| Df(1)ED14021         | 9346  | 20C3;20F1  | 21961362 | 22282277 | NO               |     |      |      |          |    |            |                               |
| <b>Chromosome 2L</b> |       |            |          |          |                  |     |      |      |          |    |            |                               |
| Df(2L)ED50001        | 24626 | 21A1;21B1  | -204333  | 72671    | ENH/non-specific | Yes | 2.67 | 0.08 | 1.77E-05 | 17 |            | acc dev                       |
| Df(2L)Exel6001       | 7488  | 21B1;21B2  | 67166    | 129261   | NO               |     |      |      |          |    |            |                               |
| Df(2L)ED5878         | 9353  | 21B1;21B3  | 67365    | 161120   | NO               |     |      |      |          |    |            |                               |
| Df(2L)ED929          | 9193  | 21B3;21B3  | 142636   | 161120   | NO               |     |      |      |          |    |            |                               |
| Df(2L)BSC454         | 24958 | 21B7;21B8  | 271351   | 307085   | NO               |     |      |      |          |    |            |                               |

|                |       |            |         |         |            |    |      |      |          |    |  |                           |
|----------------|-------|------------|---------|---------|------------|----|------|------|----------|----|--|---------------------------|
| Df(2L)BSC107   | 8673  | 21C2;21E2  | 431096  | 574741  | SUPPRESSOR | No | 2.95 | 0.08 | 1.02E-08 | 20 |  |                           |
| Df(2L)BSC456   | 24960 | 21D1;21E2  | 479689  | 816225  | NO         |    |      |      |          |    |  |                           |
| Df(2L)ED40     | 9188  | 21D1;21D2  | 480873  | 490853  | NO         |    |      |      |          |    |  | viable deficiency         |
| Df(2L)Exel8003 | 7774  | 21E2;21E2  | 559139  | 715085  | NO         |    |      |      |          |    |  |                           |
| Df(2L)Exel6002 | 7489  | 21E2;21E2  | 715084  | 826285  | NO         |    |      |      |          |    |  |                           |
| Df(2L)Exel7005 | 7775  | 21E2;21E2  | 777148  | 868373  | NO         |    |      |      |          |    |  |                           |
| Df(2L)Exel6003 | 7490  | 21E2;21E4  | 826173  | 1074079 | NO         |    |      |      |          |    |  |                           |
| Df(2L)Exel6004 | 7491  | 21E4;21F1  | 1074079 | 1158137 | NO         |    |      |      |          |    |  |                           |
| Df(2L)ED108    | 24629 | 21F1;22A1  | 1119134 | 1420528 | ENHANCER   | No | 2.67 | 0.06 | 4.93E-05 | 10 |  |                           |
| Df(2L)Exel7006 | 7776  | 21F1;21F4  | 1158197 | 1311516 | NO         |    |      |      |          |    |  |                           |
| Df(2L)Exel6005 | 7492  | 22A3;22B1  | 1555098 | 1737249 | NO         |    |      |      |          |    |  |                           |
| Df(2L)Exel7007 | 7778  | 22B1;22B5  | 1716977 | 1909976 | NO         |    |      |      |          |    |  |                           |
| Df(2L)Exel8005 | 7779  | 22B2;22B8  | 1737960 | 2010136 | NO         |    |      |      |          |    |  |                           |
| Df(2L)Exel6006 | 8000  | 22B5;22D1  | 1911627 | 2175599 | NO         |    |      |      |          |    |  |                           |
| Df(2L)Exel7008 | 7780  | 22B8;22D1  | 1989057 | 2152458 | NO         |    |      |      |          |    |  |                           |
| Df(2L)Exel6007 | 7493  | 22D1;22E1  | 2175607 | 2362917 | NO         |    |      |      |          |    |  | discrepancy with Exel7010 |
| Df(2L)Exel7010 | 7782  | 22D4;22E1  | 2221020 | 2362808 | SUPPRESSOR | No | 2.92 | 0.10 | 0.0002   | 16 |  |                           |
| Df(2L)BSC455   | 24959 | 22D5;22E1  | 2242285 | 2374023 | NO         |    |      |      |          |    |  |                           |
| Df(2L)Exel6008 | 7494  | 22F4;23A3  | 2494660 | 2755377 | NO         |    |      |      |          |    |  |                           |
| Df(2L)Exel6277 | 7744  | 23A2;23B1  | 2677694 | 2808100 | NO         |    |      |      |          |    |  |                           |
| Df(2L)ED206    | 8038  | 23B8;23C5  | 2873954 | 3055717 | NO         |    |      |      |          |    |  |                           |
| Df(2L)Exel7014 | 7784  | 23C4;23C5  | 2979654 | 3056809 | NO         |    |      |      |          |    |  |                           |
| Df(2L)Exel7015 | 7785  | 23C5;23E3  | 3046635 | 3310250 | NO         |    |      |      |          |    |  |                           |
| Df(2L)Exel8008 | 7786  | 23E3;23E5  | 3302636 | 3354858 | NO         |    |      |      |          |    |  |                           |
| Df(2L)Exel7016 | 7787  | 23E5;23F3  | 3354818 | 3473493 | NO         |    |      |      |          |    |  |                           |
| Df(2L)Exel7018 | 7789  | 24A1;24C2  | 3602642 | 3730180 | NO         |    |      |      |          |    |  |                           |
| Df(2L)BSC171   | 9604  | 24C1;24C6  | 3713827 | 3825535 | NO         |    |      |      |          |    |  |                           |
| Df(2L)Exel6009 | 7495  | 24C3;24C8  | 3771368 | 3888977 | NO         |    |      |      |          |    |  |                           |
| Df(2L)BSC166   | 9601  | 24D4;24D7  | 4031318 | 4162968 | NO         |    |      |      |          |    |  |                           |
| Df(2L)BSC165   | 9600  | 24D4;24D8  | 4031318 | 4195308 | NO         |    |      |      |          |    |  |                           |
| Df(2L)BSC225   | 9702  | 25A3;25A7  | 4721280 | 4821108 | NO         |    |      |      |          |    |  |                           |
| Df(2L)Exel6010 | 7496  | 25A7;25B1  | 4820718 | 4887766 | NO         |    |      |      |          |    |  |                           |
| Df(2L)Exel9062 | 7792  | 25B1;25B1  | 4846961 | 4887766 | NO         |    |      |      |          |    |  |                           |
| Df(2L)Exel7021 | 7795  | 25B3;25B5  | 4915628 | 4979299 | NO         |    |      |      |          |    |  |                           |
| Df(2L)Exel8013 | 7796  | 25B5;25B10 | 4975605 | 5000943 | NO         |    |      |      |          |    |  |                           |
| Df(2L)Exel7022 | 7794  | 25B10;25C3 | 5000837 | 5058522 | NO         |    |      |      |          |    |  |                           |
| Df(2L)BSC109   | 8674  | 25C4;25C8  | 5073453 | 5145500 | NO         |    |      |      |          |    |  |                           |
| Df(2L)Exel6011 | 7497  | 25C8;25D5  | 5147258 | 5305646 | NO         |    |      |      |          |    |  |                           |
| Df(2L)Exel6012 | 7498  | 25D5;25E6  | 5305646 | 5555049 | NO         |    |      |      |          |    |  |                           |

|                |       |               |         |         |                  |     |      |      |          |    |  |  |                   |
|----------------|-------|---------------|---------|---------|------------------|-----|------|------|----------|----|--|--|-------------------|
| Df(2L)Exel7023 | 7797  | 25E5;25F1     | 5524375 | 5594234 | NO               |     |      |      |          |    |  |  |                   |
| Df(2L)Exel6256 | 7724  | 25E6;25F2     | 5555049 | 5658629 | NO               |     |      |      |          |    |  |  |                   |
| Df(2L)Exel8016 | 7798  | 25E6;25F2     | 5555049 | 5659285 | NO               |     |      |      |          |    |  |  |                   |
| Df(2L)Exel6013 | 7499  | 25F2;25F5     | 5658629 | 5805324 | SUP/non-specific | Yes | n/d  |      |          |    |  |  |                   |
| Df(2L)ED280    | 9179  | 25F5;26A1     | 5801930 | 5907456 | ENHANCER         | No  | 2.63 | 0.08 | 8.54E-07 | 13 |  |  | viable deficiency |
| Df(2L)Exel6014 | 7500  | 25F5;26A3     | 5805324 | 5944680 | NO               |     |      |      |          |    |  |  |                   |
| Df(2L)Exel7024 | 7799  | 26A1;26A9     | 5898291 | 5980153 | NO               |     |      |      |          |    |  |  |                   |
| Df(2L)BSC184   | 9612  | 26B1;26B3     | 5980184 | 6051064 | NO               |     |      |      |          |    |  |  |                   |
| Df(2L)ED353    | 9186  | 26B2;26B5     | 6000124 | 6083233 | ENHANCER         | No  | 2.65 | 0.09 | 3.1E-05  | 16 |  |  |                   |
| Df(2L)BSC239   | 9714  | 26B4;26B11    | 6079298 | 6197305 | NO               |     |      |      |          |    |  |  |                   |
| Df(2L)Exel6015 | 7501  | 26B5;26B11-C1 | 6088361 | 6262082 | NO               |     |      |      |          |    |  |  |                   |
| Df(2L)Exel6016 | 7502  | 26C1;26D1     | 6253010 | 6411492 | NO               |     |      |      |          |    |  |  |                   |
| Df(2L)Exel9038 | 7800  | 26C2;26C3     | 6292895 | 6338855 | NO               |     |      |      |          |    |  |  |                   |
| Df(2L)ED369    | 8903  | 26C3;26D1     | 6339087 | 6411333 | NO               |     |      |      |          |    |  |  |                   |
| Df(2L)BSC354   | 24378 | 26D7;26E3     | 6465706 | 6557463 | ENH/non-specific | Yes | n/d  |      |          |    |  |  | acc dev           |
| Df(2L)BSC188   | 9615  | 26F1;27A2     | 6612189 | 6742726 | ENHANCER         | No  | 2.70 | 0.05 | 6.77E-06 | 24 |  |  |                   |
| Df(2L)BSC187   | 9672  | 26F3;27A1     | 6644119 | 6709113 | NO               |     |      |      |          |    |  |  |                   |
| Df(2L)Exel7027 | 7801  | 26F6;27B1     | 6664818 | 6786906 | NO               |     |      |      |          |    |  |  |                   |
| Df(2L)ED6569   | 8940  | 27A1;27C4     | 6709099 | 6921292 | ENHANCER         | No  | 2.64 | 0.07 | 6.61E-07 | 14 |  |  |                   |
| Df(2L)BSC108   | 8847  | 27C1;27C6     | 6874407 | 6945223 | NO               |     |      |      |          |    |  |  |                   |
| Df(2L)Exel7029 | 7802  | 27C4;27D4     | 6922143 | 7022707 | NO               |     |      |      |          |    |  |  |                   |
| Df(2L)BSC291   | 23676 | 27D6;27F2     | 7042642 | 7366119 | NO               |     |      |      |          |    |  |  |                   |
| Df(2L)Exel6017 | 7503  | 27E4;27F3     | 7202317 | 7418128 | NO               |     |      |      |          |    |  |  |                   |
| Df(2L)Exel7031 | 7804  | 27F2;28A3     | 7364976 | 7495492 | NO               |     |      |      |          |    |  |  |                   |
| Df(2L)ED475    | 9273  | 27F4;28B1     | 7423915 | 7576637 | NO               |     |      |      |          |    |  |  |                   |
| Df(2L)Exel6018 | 7504  | 28B1;28C1     | 7576630 | 7702880 | NO               |     |      |      |          |    |  |  |                   |
| Df(2L)Exel9031 | 7805  | 28B4;28C1     | 7637689 | 7660390 | NO               |     |      |      |          |    |  |  |                   |
| Df(2L)BSC192   | 9619  | 28C1;28D3     | 7702880 | 8003511 | NO               |     |      |      |          |    |  |  |                   |
| Df(2L)Exel7034 | 7807  | 28E1;28F1     | 8071311 | 8205166 | NO               |     |      |      |          |    |  |  |                   |
| Df(2L)BSC229   | 9706  | 28F1;29B1     | 8189147 | 8346414 | NO               |     |      |      |          |    |  |  |                   |
| Df(2L)BSC200   | 9627  | 28F5;29B1     | 8253607 | 8362842 | NO               |     |      |      |          |    |  |  |                   |
| Df(2L)ED611    | 9298  | 29B4;29C3     | 8382851 | 8419818 | NO               |     |      |      |          |    |  |  |                   |
| Df(2L)BSC201   | 9628  | 29C3;29D1     | 8416558 | 8489241 | NO               |     |      |      |          |    |  |  |                   |
| Df(2L)Exel7038 | 7809  | 29C4;29D5     | 8438123 | 8528528 | SUPPRESSOR       | No  | 2.90 | 0.06 | 1.31E-06 | 22 |  |  |                   |
| Df(2L)BSC215   | 9643  | 29D3;29E1     | 8511278 | 8544018 | SUPPRESSOR       | No  | 2.98 | 0.09 | 3.27E-10 | 25 |  |  |                   |
| Df(2L)Exel7039 | 7810  | 29D5;29F1     | 8529124 | 8801960 | NO               |     |      |      |          |    |  |  |                   |
| Df(2L)Exel7040 | 7811  | 29F1;29F6     | 8797995 | 8984993 | NO               |     |      |      |          |    |  |  |                   |
| Df(2L)Exel6021 | 7505  | 29F7;30A2     | 8989308 | 9176164 | NO               |     |      |      |          |    |  |  |                   |
| Df(2L)ED680    | 9342  | 30A4;30B12    | 9205076 | 9581740 | ENH/non-specific | Yes | 2.67 | 0.10 | 0.00026  | 6  |  |  | Eaat1             |

|                |       |            |          |          |            |     |      |      |          |    |           |  |                           |
|----------------|-------|------------|----------|----------|------------|-----|------|------|----------|----|-----------|--|---------------------------|
| Df(2L)Exel8022 | 7813  | 30B1;30B4  | 9388129  | 9448833  | NO         |     |      |      |          |    |           |  | discrepancy with Exel9064 |
| Df(2L)Exel9064 | 7814  | 30B2;30B3  | 9415663  | 9431473  | SUPPRESSOR | No* | 2.97 | 0.09 | 3.79E-09 | 20 |           |  | viable deficiency         |
| Df(2L)Exel6022 | 7506  | 30B4;30B12 | 9447643  | 9560489  | NO         |     |      |      |          |    |           |  |                           |
| Df(2L)Exel7042 | 7812  | 30B10;30C1 | 9522946  | 9622987  | NO         |     |      |      |          |    |           |  |                           |
| Df(2L)Exel6024 | 7507  | 30C1;30C9  | 9613611  | 9782218  | ENHANCER   | No  | 2.58 | 0.08 | 1.1E-09  | 16 | PKA-C1    |  |                           |
| Df(2L)Exel9040 | 7815  | 30C1;30C1  | 9613665  | 9622528  | NO         |     |      |      |          |    |           |  |                           |
| Df(2L)BSC216   | 9644  | 30C6;30E1  | 9741207  | 9908459  | ENHANCER   | No  | 2.66 | 0.07 | 8.88E-07 | 19 | nAcRα-30D |  |                           |
| Df(2L)BSC240   | 9715  | 30C7;30F2  | 9744077  | 9960586  | ENHANCER   | Yes | 2.62 | 0.06 | 1.56E-10 | 19 | nAcRα-30D |  |                           |
| Df(2L)Exel6025 | 7508  | 30C9;30E1  | 9782218  | 9897536  | ENHANCER   | No  | 2.71 | 0.06 | 0.00017  | 18 | nAcRα-30D |  |                           |
| Df(2L)Exel7043 | 7816  | 30D1;30F1  | 9860016  | 9940209  | ENHANCER   | n/d | 2.70 | 0.05 | 2.36E-05 | 18 | nAcRα-30D |  |                           |
| Df(2L)BSC205   | 9632  | 30F5;31A2  | 9984624  | 10071488 | NO         |     |      |      |          |    |           |  |                           |
| Df(2L)Exel9032 | 7818  | 31A3;31B1  | 10134181 | 10198992 | NO         |     |      |      |          |    |           |  |                           |
| Df(2L)BSC206   | 9633  | 31B1;31D9  | 10240295 | 10333704 | NO         |     |      |      |          |    |           |  |                           |
| Df(2L)Exel7046 | 7819  | 31B1;31D9  | 10276871 | 10333704 | NO         |     |      |      |          |    |           |  |                           |
| Df(2L)BSC208   | 9635  | 31D7;31D11 | 10321809 | 10381214 | NO         |     |      |      |          |    |           |  |                           |
| Df(2L)BSC342   | 24366 | 31D9;31E5  | 10349604 | 10457595 | NO         |     |      |      |          |    |           |  |                           |
| Df(2L)Exel7048 | 7999  | 31E3;31F5  | 10443323 | 10544859 | NO         |     |      |      |          |    |           |  |                           |
| Df(2L)ED746    | 8043  | 31F4;32A5  | 10506773 | 10732704 | NO         |     |      |      |          |    |           |  |                           |
| Df(2L)Exel8026 | 7820  | 31F5;32B3  | 10516675 | 10861982 | NO         |     |      |      |          |    |           |  |                           |
| Df(2L)BSC230   | 9707  | 32A5;32C1  | 10767145 | 10975285 | NO         |     |      |      |          |    |           |  |                           |
| Df(2L)Exel7049 | 7821  | 32B1;32C1  | 10853446 | 10975285 | NO         |     |      |      |          |    |           |  |                           |
| Df(2L)BSC241   | 9716  | 32C1;32F2  | 11006679 | 11445740 | NO         |     |      |      |          |    |           |  |                           |
| Df(2L)Exel6027 | 7510  | 32D2;32D5  | 11067029 | 11155825 | NO         |     |      |      |          |    |           |  |                           |
| Df(2L)BSC242   | 24905 | 32D4;32F4  | 11113086 | 11661282 | NO         |     |      |      |          |    |           |  |                           |
| Df(2L)Exel6028 | 7511  | 32D5;32E4  | 11155825 | 11358603 | NO         |     |      |      |          |    |           |  |                           |
| Df(2L)Exel6029 | 7512  | 32E4;32F2  | 11358603 | 11445762 | NO         |     |      |      |          |    |           |  |                           |
| Df(2L)BSC244   | 9718  | 32F2;33B6  | 11445733 | 12002748 | SUPPRESSOR | No  | 2.96 | 0.12 | 5.76E-06 | 21 |           |  |                           |
| Df(2L)BSC237   | 9712  | 32F2;33B5  | 11517359 | 11990983 | NO         |     |      |      |          |    |           |  |                           |
| Df(2L)BSC243   | 9717  | 32F3;33C1  | 11587693 | 12055450 | NO         |     |      |      |          |    |           |  |                           |
| Df(2L)Exel6030 | 7513  | 33A2;33B3  | 11807409 | 11971081 | NO         |     |      |      |          |    |           |  |                           |
| Df(2L)Exel6031 | 7514  | 33B3;33C2  | 11971081 | 12066847 | NO         |     |      |      |          |    |           |  |                           |
| Df(2L)ED775    | 8907  | 33B8;34A3  | 12010010 | 12975028 | NO         |     |      |      |          |    |           |  |                           |
| Df(2L)BSC407   | 24911 | 33D2;33F2  | 12175437 | 12657948 | NO         |     |      |      |          |    |           |  |                           |
| Df(2L)Exel6033 | 7516  | 33E4;33F2  | 12423459 | 12655793 | NO         |     |      |      |          |    |           |  |                           |
| Df(2L)Exel6034 | 7517  | 33F2;34A1  | 12655793 | 12854729 | NO         |     |      |      |          |    |           |  |                           |
| Df(2L)Exel8028 | 7822  | 34A1;34A2  | 12832803 | 12896409 | NO         |     |      |      |          |    |           |  | viable deficiency         |
| Df(2L)Exel7055 | 7823  | 34A2;34A7  | 12872617 | 13165936 | NO         |     |      |      |          |    |           |  |                           |
| Df(2L)BSC340   | 24364 | 34B4;34B8  | 13290513 | 13369329 | NO         |     |      |      |          |    |           |  |                           |
| Df(2L)BSC147   | 9506  | 34C1;34C6  | 13445419 | 13665417 | SUPPRESSOR | No  | 2.88 | 0.10 | 1.83E-05 | 55 |           |  |                           |

|                   |       |            |          |          |                  |     |      |      |          |    |       |                   |
|-------------------|-------|------------|----------|----------|------------------|-----|------|------|----------|----|-------|-------------------|
| Df(2L)BSC691      | 26543 | 34C3;34D1  | 13512897 | 13721648 | NO               |     |      |      |          |    |       |                   |
| Df(2L)FDD-0428643 | 25166 | 34C3;34D6  | 13513468 | 13834944 | NO               |     |      |      |          |    |       |                   |
| Df(2L)Exel7059    | 7826  | 34D1;34E1  | 13800829 | 13878188 | NO               |     |      |      |          |    |       |                   |
| Df(2L)BSC345      | 24369 | 34E1;34E5  | 13878659 | 13952948 | NO               |     |      |      |          |    |       |                   |
| Df(2L)ED8186      | 25164 | 34E4;35A4  | 13934848 | 14334190 | ENH/non-specific | Yes | 2.66 | 0.06 | 1.92E-07 | 16 |       |                   |
| Df(2L)Exel6035    | 7518  | 35A3;35B2  | 14300969 | 14470247 | NO               |     |      |      |          |    |       |                   |
| Df(2L)Exel6036    | 7519  | 35B1;35B2  | 14409711 | 14490657 | NO               |     |      |      |          |    |       |                   |
| Df(2L)Exel8033    | 7828  | 35B1;35B8  | 14455715 | 14997588 | NO               |     |      |      |          |    |       |                   |
| Df(2L)BSC254      | 23154 | 35B6;35C1  | 14813882 | 15074656 | NO               |     |      |      |          |    |       |                   |
| Df(2L)ED800       | 9192  | 35B2;35D1  | 14490575 | 15332688 | ENHANCER         | No  | 2.63 | 0.07 | 1.4E-08  | 18 | Cul-3 |                   |
| Df(2L)ED1004      | 25163 | 35B10;35D1 | 15061074 | 15333766 | ENHANCER         | No  | 2.53 | 0.08 | 3.55E-13 | 18 | Cul-3 |                   |
| Df(2L)Exel8034    | 7830  | 35C5;35D2  | 15264714 | 15439965 | ENHANCER         | n/d | n/d  |      |          |    | Cul-3 |                   |
| Df(2L)Exel7063    | 7831  | 35D2;35D4  | 15426051 | 15744445 | NO               |     |      |      |          |    |       |                   |
| Df(2L)BSC690      | 26542 | 35D4;35D4  | 15745455 | 15821840 | NO               |     |      |      |          |    |       |                   |
| Df(2L)Exel6038    | 7521  | 35D6;35E2  | 15912343 | 16042754 | NO               |     |      |      |          |    |       |                   |
| Df(2L)BSC278      | 23663 | 35E1;35F1  | 16025369 | 16289284 | NO               |     |      |      |          |    |       |                   |
| Df(2L)Exel7066    | 7833  | 36A1;36A12 | 16457328 | 16727482 | ENH/non-specific | Yes | 2.64 | 0.07 | 5.83E-07 | 14 |       |                   |
| Df(2L)Exel6039    | 7522  | 36A10;36B3 | 16685211 | 16886557 | ENH/non-specific | Yes | 2.71 | 0.09 | 0.006038 | 19 |       |                   |
| Df(2L)Exel7067    | 7834  | 36A12;36B1 | 16728375 | 16824908 | ENH/non-specific | Yes | 2.61 | 0.08 | 1.04E-10 | 25 |       |                   |
| Df(2L)Exel8036    | 7835  | 36B1;36C9  | 16791487 | 17450255 | NO               |     |      |      |          |    |       |                   |
| Df(2L)Exel7068    | 7838  | 36C7;36C10 | 17382988 | 17495992 | NO               |     |      |      |          |    |       |                   |
| Df(2L)BSC148      | 9507  | 36C8;36E3  | 17428248 | 17965422 | ENHANCER         | No  | 2.67 | 0.08 | 3.17E-06 | 24 |       |                   |
| Df(2L)Exel7069    | 7837  | 36C10;36D3 | 17482011 | 17773525 | NO               |     |      |      |          |    |       |                   |
| Df(2L)Exel9044    | 7836  | 36C10;36D1 | 17502487 | 17604760 | NO               |     |      |      |          |    |       |                   |
| Df(2L)Exel7070    | 7839  | 36E2;36E6  | 17903087 | 18161791 | NO               |     |      |      |          |    |       |                   |
| Df(2L)BSC256      | 23156 | 36E3;36F2  | 18061946 | 18320008 | SUPPRESSOR       | No  | 2.92 | 0.09 | 2.98E-09 | 54 |       |                   |
| Df(2L)Exel9033    | 7841  | 36F2;36F2  | 18294845 | 18299279 | NO               |     |      |      |          |    |       | viable deficiency |
| Df(2L)BSC149      | 9508  | 36F5;36F10 | 18444727 | 18673286 | NO               |     |      |      |          |    |       |                   |
| Df(2L)Exel6041    | 7523  | 36F6;37A2  | 18571864 | 18732675 | NO               |     |      |      |          |    |       |                   |
| Df(2L)Exel7071    | 7843  | 37A1;37A4  | 18689053 | 18795820 | NO               |     |      |      |          |    |       |                   |
| Df(2L)Exel7072    | 7844  | 37A2;37B6  | 18753432 | 18943942 | NO               |     |      |      |          |    |       |                   |
| Df(2L)Exel7073    | 7845  | 37B1;37B9  | 18859186 | 19022139 | NO               |     |      |      |          |    |       |                   |
| Df(2L)Exel6042    | 7524  | 37B8;37C5  | 18973942 | 19161727 | NO               |     |      |      |          |    |       |                   |
| Df(2L)Exel8039    | 7846  | 37B8;37B11 | 18995784 | 19044446 | NO               |     |      |      |          |    |       |                   |
| Df(2L)ED1200      | 9173  | 37B9;37C5  | 19003398 | 19158447 | NO               |     |      |      |          |    |       |                   |
| Df(2L)BSC341      | 24365 | 37B11;37D3 | 19041923 | 19381720 | NO               |     |      |      |          |    |       |                   |
| Df(2L)Exel8040    | 7847  | 37C1;37C5  | 19110141 | 19161708 | NO               |     |      |      |          |    |       |                   |
| Df(2L)Exel6043    | 7525  | 37C5;37D7  | 19161727 | 19423709 | NO               |     |      |      |          |    |       |                   |
| Df(2L)BSC301      | 23684 | 37D1;37E5  | 19270784 | 19528383 | NO               |     |      |      |          |    |       |                   |



|                      |       |            |          |          |            |     |      |      |          |    |        |                                    |
|----------------------|-------|------------|----------|----------|------------|-----|------|------|----------|----|--------|------------------------------------|
| Df(2L)Exel8041       | 7849  | 37D7;37F2  | 19426459 | 19586375 | SUPPRESSOR | No* | 2.95 | 0.08 | 1.74E-07 | 18 | Rab9   |                                    |
| Df(2L)Exel9043       | 7913  | 37E1;37E1  | 19438065 | 19452918 | NO         |     |      |      |          |    |        |                                    |
| Df(2L)Exel6044       | 7526  | 37F2;38A3  | 19576108 | 19764726 | NO         |     |      |      |          |    |        |                                    |
| Df(2L)Exel6045       | 7527  | 38A3;38A7  | 19764726 | 19935139 | SUPPRESSOR | No  | 3.01 | 0.08 | 6.19E-11 | 17 |        |                                    |
| Df(2L)Exel7077       | 7850  | 38A7;38B2  | 19918015 | 20072236 | NO         |     |      |      |          |    |        |                                    |
| Df(2L)BSC860         | 29030 | 38B1;38C5  | 20035763 | 20310769 | NO         |     |      |      |          |    |        |                                    |
| Df(2L)ED1305         | 9222  | 38B4;38C6  | 20085397 | 20382385 | ENHANCER   | No  | 2.65 | 0.09 | 6.12E-07 | 18 |        |                                    |
| Df(2L)Exel6046       | 7528  | 38C2;38C7  | 20205107 | 20458307 | NO         |     |      |      |          |    |        |                                    |
| Df(2L)Exel7078       | 7851  | 38C7;38D5  | 20449190 | 20680624 | NO         |     |      |      |          |    |        |                                    |
| Df(2L)Exel7079       | 7852  | 38E9;38F3  | 20770538 | 20874804 | NO         |     |      |      |          |    |        |                                    |
| Df(2L)BSC333         | 24357 | 38F1;39A6  | 20831386 | 21155355 | NO         |     |      |      |          |    |        | discrepancy with BSC105 & Exel7080 |
| Df(2L)BSC105         | 8671  | 38F2;38F4  | 20851900 | 20890383 | SUPPRESSOR | No* | 2.95 | 0.08 | 3.41E-06 | 17 |        |                                    |
| Df(2L)Exel7080       | 7853  | 38F3;39A2  | 20861544 | 21102742 | SUPPRESSOR | No* | 2.92 | 0.08 | 2.54E-08 | 37 |        |                                    |
| Df(2L)BSC302         | 23685 | 39A1;39A6  | 21070044 | 21158652 | SUPPRESSOR | No  | 3.03 | 0.11 | 2.45E-13 | 31 | Dap160 |                                    |
| Df(2L)Exel6047       | 7529  | 39A2;39B4  | 21102742 | 21244119 | SUPPRESSOR | No  | 2.90 | 0.10 | 0.00015  | 19 | Dap160 |                                    |
| Df(2L)BSC312         | 24338 | 39A4;39B2  | 21147512 | 21206341 | NO         |     |      |      |          |    |        |                                    |
| Df(2L)Exel6048       | 7530  | 39B4;39C2  | 21237271 | 21309519 | NO         |     |      |      |          |    |        |                                    |
| Df(2L)Exel7081       | 7855  | 39C2;39E6  | 21309519 | 21662938 | NO         |     |      |      |          |    |        |                                    |
| Df(2L)ED1466         | 9340  | 39E3;40A5  | 21629316 | 21828548 | NO         |     |      |      |          |    |        |                                    |
| Df(2L)Exel6049       | 7531  | 40A5;40D3  | 21828252 | 22019296 | NO         |     |      |      |          |    |        |                                    |
| Df(2L)BSC151         | 9510  | 40A5;40E5  | 21828581 | 22139023 | NO         |     |      |      |          |    |        |                                    |
| <b>Chromosome 2R</b> |       |            |          |          |            |     |      |      |          |    |        |                                    |
| Df(2R)BSC630         | 25705 | 41D3;41F11 | 1015322  | 1669918  | NO         |     |      |      |          |    |        |                                    |
| Df(2R)BSC696         | 26548 | 41F1;41F11 | 1304605  | 1669934  | NO         |     |      |      |          |    |        |                                    |
| Df(2R)BSC697         | 26549 | 41F6;41F11 | 1562003  | 1669934  | NO         |     |      |      |          |    |        |                                    |
| Df(2R)ED1482         | 23228 | 42A8;4A11  | 1923128  | 2019615  | NO         |     |      |      |          |    |        |                                    |
| Df(2R)BSC326         | 24351 | 42A14;42C7 | 2123567  | 2633535  | NO         |     |      |      |          |    |        |                                    |
| Df(2R)Exel6050       | 7532  | 42C7;42D6  | 2628314  | 2760146  | NO         |     |      |      |          |    |        |                                    |
| Df(2R)BSC261         | 23161 | 42D1;42E5  | 2670129  | 2912551  | NO         |     |      |      |          |    |        |                                    |
| Df(2R)Exel6051       | 7533  | 42D6;42E4  | 2760146  | 2880531  | NO         |     |      |      |          |    |        |                                    |
| Df(2R)BSC262         | 23297 | 42D6;42F1  | 2789579  | 2994138  | SUPPRESSOR | No  | 2.87 | 0.10 | 0.000159 | 63 |        |                                    |
| Df(2R)Exel6283       | 7748  | 42E5;42F2  | 2927526  | 3034554  | NO         |     |      |      |          |    |        |                                    |
| Df(2R)BSC263         | 23162 | 42F2;43C1  | 3034369  | 3334915  | NO         |     |      |      |          |    |        |                                    |
| Df(2R)BSC264         | 23163 | 43B2;43C5  | 3283390  | 3377339  | SUPPRESSOR | No  | 2.97 | 0.07 | 4.34E-13 | 35 |        |                                    |
| Df(2R)Exel6052       | 7534  | 43C5;43E5  | 3380702  | 3510588  | NO         |     |      |      |          |    |        |                                    |
| Df(2R)Exel6053       | 7535  | 43D3;43E9  | 3421058  | 3553300  | NO         |     |      |      |          |    |        |                                    |
| Df(2R)Exel7092       | 7858  | 43E5;43E12 | 3509940  | 3596212  | NO         |     |      |      |          |    |        |                                    |
| Df(2R)Exel6054       | 7536  | 43E9;43E18 | 3553300  | 3699977  | NO         |     |      |      |          |    |        |                                    |

|                |       |             |         |         |                  |     |      |      |          |    |     |                            |
|----------------|-------|-------------|---------|---------|------------------|-----|------|------|----------|----|-----|----------------------------|
| Df(2R)BSC265   | 23164 | 43E16;43F4  | 3670332 | 3826552 | NO               |     |      |      |          |    |     |                            |
| Df(2R)Exel6055 | 7537  | 43F1;44A4   | 3773849 | 3948670 | NO               |     |      |      |          |    |     |                            |
| Df(2R)Exel6056 | 7538  | 44A4;44C2   | 3948670 | 4119961 | NO               |     |      |      |          |    |     |                            |
| Df(2R)Exel7094 | 7859  | 44A4;44B3   | 3948670 | 4019248 | NO               |     |      |      |          |    |     |                            |
| Df(2R)Exel7095 | 7860  | 44B3;44C2   | 4012164 | 4119968 | SUP/non-specific | Yes | 2.93 | 0.09 | 1.83E-08 | 29 |     |                            |
| Df(2R)Exel6057 | 7539  | 44B8;44C4   | 4062156 | 4214936 | NO               |     |      |      |          |    |     |                            |
| Df(2R)Exel6058 | 7540  | 44C4;44D1   | 4215033 | 4332249 | NO               |     |      |      |          |    |     |                            |
| Df(2R)Exel7096 | 7862  | 44C6;44D3   | 4321177 | 4460278 | NO               |     |      |      |          |    |     |                            |
| Df(2R)Exel8047 | 7863  | 44D4;44D5   | 4487805 | 4536994 | NO               |     |      |      |          |    |     |                            |
| Df(2R)Exel7098 | 7864  | 44D5;44E3   | 4536987 | 4621135 | SUPPRESSOR       | No  | 3.03 | 0.09 | 2.16E-11 | 20 |     |                            |
| Df(2R)BSC268   | 26501 | 44E2;45A1   | 4594483 | 4918550 | SUPPRESSOR       | No  | 2.93 | 0.06 | 4.79E-07 | 26 |     |                            |
| Df(2R)BSC269   | 23165 | 44E3;44F3   | 4609944 | 4786258 | NO               |     |      |      |          |    |     |                            |
| Df(2R)BSC270   | 23166 | 44F9;45A2   | 4831372 | 4982207 | NO               |     |      |      |          |    |     |                            |
| Df(2R)BSC271   | 23167 | 44F12;45A12 | 4863904 | 5030926 | SUPPRESSOR       | No  | 2.92 | 0.07 | 4.13E-08 | 26 |     |                            |
| Df(2R)BSC279   | 23664 | 45A9;45E3   | 5009694 | 5403346 | SUPPRESSOR       | No  | 2.94 | 0.09 | 2.12E-09 | 31 |     |                            |
| Df(2R)BSC280   | 23665 | 45C4;45F4   | 5180164 | 5466121 | NO               |     |      |      |          |    |     |                            |
| Df(2R)BSC408   | 24912 | 45D4;45F4   | 5296452 | 5466121 | NO               |     |      |      |          |    |     |                            |
| Df(2R)BSC131   | 9296  | 46A1;46B4   | 5545883 | 5727104 | SUPPRESSOR       | No  | 2.89 | 0.06 | 5.16E-06 | 20 |     |                            |
| Df(2R)Exel9016 | 7867  | 46B1;46B2   | 5600306 | 5607756 | NO               |     |      |      |          |    |     |                            |
| Df(2R)BSC133   | 9411  | 46B4;46C1   | 5724101 | 5763500 | NO               |     |      |      |          |    |     |                            |
| Df(2R)BSC152   | 9539  | 46C1;46D6   | 5762817 | 5918044 | SUPPRESSOR       | No  | 2.92 | 0.11 | 1.04E-05 | 28 |     |                            |
| Df(2R)BSC158   | 9545  | 46C1;46D4   | 5762817 | 5912815 | SUPPRESSOR       | No  | 2.95 | 0.06 | 0.000642 | 6  |     |                            |
| Df(2R)BSC303   | 23686 | 46E1;46F3   | 5965797 | 6035409 | NO               |     |      |      |          |    |     |                            |
| Df(2R)BSC281   | 23666 | 46F1;47A9   | 6012734 | 6350379 | NO               |     |      |      |          |    |     |                            |
| Df(2R)BSC639   | 25729 | 47B7;47F1   | 6605898 | 7176083 | ENHANCER         | No  | 2.64 | 0.09 | 1.73E-06 | 17 |     |                            |
| Df(2R)BSC328   | 24353 | 47C1;47F5   | 6701340 | 7246094 | NO               |     |      |      |          |    |     | discrepancy with Exel 6059 |
| Df(2R)Exel6059 | 7541  | 47C5;47D6   | 6761890 | 7073552 | ENHANCER         | No  | 2.66 | 0.08 | 4.5E-06  | 16 |     |                            |
| Df(2R)BSC314   | 24340 | 47C5;47D4   | 6761891 | 6994990 | NO               |     |      |      |          |    |     |                            |
| Df(2R)Exel6060 | 7542  | 47D6;47F8   | 7073443 | 7285333 | NO               |     |      |      |          |    |     |                            |
| Df(2R)BSC231   | 25719 | 47F8;48B6   | 7276012 | 7554213 | SUPPRESSOR       | No  | 3.08 | 0.07 | 1.9E-15  | 17 |     |                            |
| Df(2R)BSC160   | 9595  | 47F12;48A5  | 7323718 | 7518183 | NO               |     |      |      |          |    |     |                            |
| Df(2R)BSC259   | 23159 | 48A3;48C4   | 7480516 | 7711276 | NO               |     |      |      |          |    |     |                            |
| Df(2R)BSC329   | 24354 | 48A3;48D3   | 7480517 | 7823463 | NO               |     |      |      |          |    |     |                            |
| Df(2R)BSC199   | 9626  | 48C5;48E4   | 7779605 | 8059989 | SUPPRESSOR       | No  | 3.10 | 0.10 | 2.38E-11 | 18 | jeb |                            |
| Df(2R)BSC699   | 26551 | 48D7;48E6   | 7907386 | 8070095 | SUPPRESSOR       | No  | 3.04 | 0.08 | 8.53E-10 | 14 | jeb |                            |
| Df(2R)Exel6061 | 7543  | 48F1;49A6   | 8149005 | 8324950 | NO               |     |      |      |          |    |     |                            |
| Df(2R)BSC829   | 27911 | 49A1;49A9   | 8238453 | 8384335 | NO               |     |      |      |          |    |     |                            |
| Df(2R)BSC305   | 23688 | 49A4;49A10  | 8313104 | 8392638 | NO               |     |      |      |          |    |     |                            |
| Df(2R)BSC880   | 30585 | 49A9;49E1   | 8384335 | 8781621 | NO               |     |      |      |          |    |     |                            |

|                |       |               |          |          |                  |     |      |      |          |    |      |  |  |
|----------------|-------|---------------|----------|----------|------------------|-----|------|------|----------|----|------|--|--|
| Df(2R)Exel7121 | 7869  | 49B5;49B12    | 8458192  | 8567258  | NO               |     |      |      |          |    |      |  |  |
| Df(2R)Exel8056 | 7916  | 49C2;49E1     | 8630644  | 8781621  | NO               |     |      |      |          |    |      |  |  |
| Df(2R)Exel7123 | 7870  | 49D5;49E6     | 8749715  | 8868687  | NO               |     |      |      |          |    |      |  |  |
| Df(2R)Exel6062 | 7544  | 49E6;49F1     | 8868689  | 8922684  | NO               |     |      |      |          |    |      |  |  |
| Df(2R)Exel8057 | 7871  | 49F1;49F10    | 8922352  | 9106854  | NO               |     |      |      |          |    |      |  |  |
| Df(2R)BSC273   | 23169 | 49F4;50A13    | 9047084  | 9389655  | SUP/non-specific | Yes | 2.95 | 0.1  | 0.00838  | 18 |      |  |  |
| Df(2R)Exel7124 | 7872  | 49F10;50A1    | 9106635  | 9168758  | SUPPRESSOR       | No  | 3.07 | 0.10 | 1.93E-08 | 13 |      |  |  |
| Df(2R)BSC272   | 23168 | 49F10;49F13   | 9106635  | 9136746  | NO               |     |      |      |          |    |      |  |  |
| Df(2R)BSC306   | 23689 | 50A3;50B1     | 9251638  | 9427394  | NO               |     |      |      |          |    |      |  |  |
| Df(2R)BSC274   | 23170 | 50A7;50B4     | 9317969  | 9480777  | NO               |     |      |      |          |    |      |  |  |
| Df(2R)BSC307   | 23690 | 50B6;50C18    | 9510513  | 9849106  | SUPPRESSOR       | No  | 2.86 | 0.08 | 0.002652 | 28 |      |  |  |
| Df(2R)Exel7128 | 7873  | 50C5;50C9     | 9689461  | 9785332  | SUPPRESSOR       | No  | 3.00 | 0.07 | 2.21E-12 | 21 |      |  |  |
| Df(2R)BSC383   | 24407 | 50C6;50D2     | 9726984  | 9912384  | SUPPRESSOR       | No  | 2.86 | 0.07 | 0.000881 | 28 |      |  |  |
| Df(2R)Exel7130 | 7875  | 50D4;50E4     | 9960585  | 10100288 | NO               |     |      |      |          |    |      |  |  |
| Df(2R)Exel7131 | 7876  | 50E4;50F6     | 10118170 | 10247931 | NO               |     |      |      |          |    |      |  |  |
| Df(2R)BSC700   | 26552 | 50E6;51A2     | 10153306 | 10299890 | NO               |     |      |      |          |    |      |  |  |
| Df(2R)Exel8059 | 7877  | 51A4-5;51B1   | 10345712 | 10463088 | NO               |     |      |      |          |    |      |  |  |
| Df(2R)Exel6284 | 7749  | 51B1;51C2     | 10462255 | 10653275 | NO               |     |      |      |          |    |      |  |  |
| Df(2R)BSC429   | 24933 | 51C2;51D1     | 10657714 | 10761429 | SUPPRESSOR       | No  | 2.93 | 0.06 | 8.03E-10 | 31 |      |  |  |
| Df(2R)Exel7135 | 7879  | 51E2;51E11    | 11017461 | 11150447 | NO               |     |      |      |          |    |      |  |  |
| Df(2R)BSC346   | 24370 | 51E7;52C2     | 11105513 | 11622949 | NO               |     |      |      |          |    |      |  |  |
| Df(2R)Exel9015 | 7880  | 51F11;51F12   | 11262681 | 11273829 | NO               |     |      |      |          |    |      |  |  |
| Df(2R)Exel6285 | 7750  | 52A4;52B5     | 11371023 | 11563707 | NO               |     |      |      |          |    |      |  |  |
| Df(2R)Exel9026 | 7881  | 52A13;52A13   | 11456133 | 11463338 | NO               |     |      |      |          |    |      |  |  |
| Df(2R)Exel7137 | 7882  | 52A13-14;52C8 | 11463390 | 11746753 | NO               |     |      |      |          |    |      |  |  |
| Df(2R)BSC308   | 23691 | 52B5;52D15    | 11567721 | 11918784 | NO               |     |      |      |          |    |      |  |  |
| Df(2R)BSC482   | 24986 | 52C8;52D5     | 11748787 | 11838157 | NO               |     |      |      |          |    |      |  |  |
| Df(2R)Exel7138 | 7883  | 52D1;52D12    | 11805928 | 11895238 | NO               |     |      |      |          |    |      |  |  |
| Df(2R)ED2457   | 8915  | 52D11;52E7    | 11887814 | 12017662 | NO               |     |      |      |          |    |      |  |  |
| Df(2R)ED2487   | 29661 | 52E6;53C4     | 12012439 | 12273917 | ENH/non-specific | Yes | 2.67 | 0.05 | 4.44E-12 | 22 |      |  |  |
| Df(2R)Exel9060 | 7885  | 52E11;52F1    | 12030362 | 12046356 | NO               |     |      |      |          |    |      |  |  |
| Df(2R)BSC609   | 25442 | 52F6;53A5     | 12075259 | 12169783 | NO               |     |      |      |          |    |      |  |  |
| Df(2R)Exel6063 | 7545  | 52F6;53C4     | 12075393 | 12274020 | NO               |     |      |      |          |    |      |  |  |
| Df(2R)BSC309   | 23692 | 52F11;53B1    | 12117729 | 12176803 | NO               |     |      |      |          |    |      |  |  |
| Df(2R)Exel7142 | 7886  | 53B1;53C4     | 12176759 | 12312794 | NO               |     |      |      |          |    |      |  |  |
| Df(2R)BSC550   | 25078 | 53C1;53C6     | 12224286 | 12382237 | NO               |     |      |      |          |    |      |  |  |
| Df(2R)Exel6064 | 7546  | 53C11;53D11   | 12499138 | 12716579 | SUPPRESSOR       | No  | 2.86 | 0.10 | 0.001433 | 20 | dAlk |  |  |
| Df(2R)Exel7145 | 7887  | 53D4;53D12    | 12618999 | 12734126 | NO               |     |      |      |          |    |      |  |  |
| Df(2R)BSC382   | 24406 | 53D8;53E1     | 12663669 | 12789130 | SUP/non-specific | Yes | 2.97 | 0.07 | 1.46E-12 | 29 |      |  |  |

|                |       |             |          |          |                  |     |      |      |          |    |        |  |                         |
|----------------|-------|-------------|----------|----------|------------------|-----|------|------|----------|----|--------|--|-------------------------|
| Df(2R)ED2747   | 9278  | 53D11;53F8  | 12716578 | 12984808 | NO               |     |      |      |          |    |        |  |                         |
| Df(2R)ED2751   | 8916  | 53D14;53F8  | 12744676 | 12984808 | NO               |     |      |      |          |    |        |  |                         |
| Df(2R)Exel6065 | 7547  | 53D14;53D14 | 12744683 | 12985001 | SUPPRESSOR       | No  | 2.98 | 0.08 | 9.71E-13 | 37 |        |  |                         |
| Df(2R)BSC331   | 24356 | 53D14;54A1  | 12756835 | 13027428 | NO               |     |      |      |          |    |        |  |                         |
| Df(2R)BSC359   | 24383 | 53E4;53F8   | 12872143 | 12984821 | NO               |     |      |      |          |    |        |  |                         |
| Df(2R)BSC433   | 24937 | 53F4;53F8   | 12950420 | 12984820 | NO               |     |      |      |          |    |        |  |                         |
| Df(2R)Exel6066 | 7548  | 53F8;54B6   | 12985074 | 13282147 | NO               |     |      |      |          |    |        |  |                         |
| Df(2R)BSC154   | 9541  | 54B2;54B7   | 13192288 | 13308316 | NO               |     |      |      |          |    |        |  |                         |
| Df(2R)BSC161   | 9596  | 54B2;54B17  | 13192288 | 13372333 | SUPPRESSOR       | No  | 2.95 | 0.07 | 2.24E-09 | 21 | cnk    |  |                         |
| Df(2R)BSC355   | 24379 | 54B16;54C3  | 13349852 | 13424178 | NO               |     |      |      |          |    |        |  | discrepancy with BSC406 |
| Df(2R)BSC406   | 24430 | 54B16;54C1  | 13349852 | 13405632 | SUPPRESSOR       | No  | 2.96 | 0.08 | 1.3E-08  | 20 |        |  |                         |
| Df(2R)Exel7149 | 7890  | 54C10;54D5  | 13469001 | 13579292 | NO               |     |      |      |          |    |        |  |                         |
| Df(2R)BSC347   | 24371 | 54D2;54E9   | 13522004 | 13680154 | NO               |     |      |      |          |    |        |  |                         |
| Df(2R)Exel7150 | 7891  | 54E1;54E9   | 13603767 | 13669537 | NO               |     |      |      |          |    |        |  |                         |
| Df(2R)BSC338   | 24362 | 54F1;55B1   | 13742225 | 13928168 | SUPPRESSOR       | No  | 2.92 | 0.06 | 1.93E-06 | 14 |        |  |                         |
| Df(2R)BSC483   | 24987 | 55A1;55B7   | 13778659 | 14015980 | NO               |     |      |      |          |    |        |  |                         |
| Df(2R)BSC334   | 24358 | 55B2;55C4   | 13938702 | 14244542 | SUPPRESSOR       | No  | 2.87 | 0.06 | 0.000251 | 15 |        |  |                         |
| Df(2R)Exel7153 | 7893  | 55B9;55C1   | 14038949 | 14118059 | NO               |     |      |      |          |    |        |  |                         |
| Df(2R)BSC337   | 24361 | 55B11;55C9  | 14061075 | 14328452 | NO               |     |      |      |          |    |        |  |                         |
| Df(2R)BSC399   | 24423 | 55D1;55E10  | 14391375 | 14618277 | NO               |     |      |      |          |    |        |  |                         |
| Df(2R)BSC339   | 24363 | 55E2;55F6   | 14502155 | 14717234 | SUPPRESSOR       | No* | 3.13 | 0.09 | 4.32E-14 | 17 |        |  |                         |
| Df(2R)Exel7157 | 7894  | 55E2;55E10  | 14509027 | 14618276 | NO               |     |      |      |          |    |        |  |                         |
| Df(2R)Exel7158 | 7895  | 55E9;55F6   | 14593031 | 14717233 | SUPPRESSOR       | No* | 2.86 | 0.07 | 0.004653 | 19 |        |  |                         |
| Df(2R)Exel6067 | 7549  | 55F8;55F8   | 14745547 | 14834784 | NO               |     |      |      |          |    |        |  |                         |
| Df(2R)Exel6068 | 7550  | 56A1;56B5   | 14834791 | 15029454 | NO               |     |      |      |          |    |        |  |                         |
| Df(2R)Exel6069 | 7551  | 56B5;56C11  | 15029454 | 15213128 | NO               |     |      |      |          |    |        |  |                         |
| Df(2R)BSC135   | 9423  | 56C11;56D5  | 15215243 | 15311082 | NO               |     |      |      |          |    |        |  |                         |
| Df(2R)BSC782   | 27354 | 56D8;56D14  | 15338532 | 15389309 | NO               |     |      |      |          |    |        |  |                         |
| Df(2R)BSC828   | 27910 | 56D10;56E1  | 15351032 | 15552519 | NO               |     |      |      |          |    |        |  |                         |
| Df(2R)BSC820   | 27581 | 56D14;56E1  | 15389309 | 15519525 | NO               |     |      |      |          |    |        |  |                         |
| Df(2R)BSC594   | 25678 | 56E1;56F9   | 15519529 | 16086559 | NO               |     |      |      |          |    |        |  |                         |
| Df(2R)BSC701   | 26553 | 56F15;57A9  | 16166339 | 16554778 | SUPPRESSOR       | No* | 3.08 | 0.10 | 2.25E-11 | 18 | CKIIβ2 |  |                         |
| Df(2R)BSC702   | 26554 | 57A2;57B3   | 16311622 | 16758360 | NO               |     |      |      |          |    |        |  |                         |
| Df(2R)Exel7164 | 7898  | 57A6;57A9   | 16469676 | 16554355 | NO               |     |      |      |          |    |        |  |                         |
| Df(2R)Exel6070 | 7552  | 57A6;57B3   | 16470285 | 16723538 | NO               |     |      |      |          |    |        |  |                         |
| Df(2R)BSC403   | 24427 | 57A8;57B1   | 16518066 | 16585801 | NO               |     |      |      |          |    |        |  |                         |
| Df(2R)BSC404   | 24428 | 57A9;57B4   | 16554779 | 16770204 | SUPPRESSOR       | No  | 2.94 | 0.08 | 8.93E-07 | 18 |        |  |                         |
| Df(2R)Exel6071 | 7553  | 57B3;57B16  | 16723538 | 16944303 | NO               |     |      |      |          |    |        |  |                         |
| Df(2R)Exel7166 | 7998  | 57B3;57B5   | 16758362 | 16887668 | SUP/non-specific | Yes | 3.10 | 0.09 | 1.64E-14 | 21 | Act57B |  |                         |

|                |       |            |          |          |            |    |      |      |          |    |       |  |                         |
|----------------|-------|------------|----------|----------|------------|----|------|------|----------|----|-------|--|-------------------------|
| Df(2R)BSC814   | 27385 | 57B5;57B19 | 16862884 | 16975752 | NO         |    |      |      |          |    |       |  |                         |
| Df(2R)Exel6072 | 7554  | 57B16;57D4 | 16944303 | 17138350 | NO         |    |      |      |          |    |       |  |                         |
| Df(2R)BSC885   | 30590 | 57D2;57D10 | 17102728 | 17189303 | NO         |    |      |      |          |    |       |  |                         |
| Df(2R)BSC821   | 27582 | 57D10;57E6 | 17189303 | 17384714 | SUPPRESSOR | No | 2.95 | 0.07 | 4.53E-08 | 15 |       |  |                         |
| Df(2R)Exel6076 | 7556  | 57E1;57F3  | 17267032 | 17494586 | NO         |    |      |      |          |    |       |  |                         |
| Df(2R)BSC360   | 24384 | 57E6;58A4  | 17384715 | 17857744 | NO         |    |      |      |          |    |       |  |                         |
| Df(2R)ED3923   | 8942  | 57F6;57F10 | 17534119 | 17601689 | NO         |    |      |      |          |    |       |  |                         |
| Df(2R)ED3943   | 9158  | 57F10;58D4 | 17600861 | 18289584 | NO         |    |      |      |          |    |       |  |                         |
| Df(2R)Exel6077 | 7557  | 57F10;58A3 | 17601473 | 17759533 | NO         |    |      |      |          |    |       |  |                         |
| Df(2R)Exel7169 | 7900  | 58A3;58B1  | 17749738 | 17927135 | NO         |    |      |      |          |    |       |  |                         |
| Df(2R)Exel6078 | 7558  | 58B1;58D1  | 17927045 | 18085148 | NO         |    |      |      |          |    |       |  |                         |
| Df(2R)Exel7170 | 7901  | 58B1;58C1  | 17927146 | 18023434 | NO         |    |      |      |          |    |       |  |                         |
| Df(2R)Exel7171 | 7902  | 58C1;58D2  | 18023507 | 18130755 | NO         |    |      |      |          |    |       |  |                         |
| Df(2R)Exel7173 | 7903  | 58D4;58E5  | 18267956 | 18401643 | SUPPRESSOR | No | 2.97 | 0.09 | 2.25E-08 | 19 |       |  |                         |
| Df(2R)BSC787   | 27359 | 58F4;59B1  | 18549332 | 18685826 | NO         |    |      |      |          |    |       |  |                         |
| Df(2R)Exel6079 | 7559  | 59A3;59B1  | 18616872 | 18685827 | NO         |    |      |      |          |    |       |  |                         |
| Df(2R)BSC698   | 26550 | 59C1;59D11 | 18889174 | 19307192 | NO         |    |      |      |          |    |       |  |                         |
| Df(2R)Exel7177 | 7906  | 59C3;59D2  | 18956207 | 19091521 | NO         |    |      |      |          |    |       |  |                         |
| Df(2R)BSC777   | 27349 | 59C4;59E1  | 18997609 | 19331635 | SUPPRESSOR | No | 2.94 | 0.09 | 4.53E-08 | 25 |       |  |                         |
| Df(2R)Exel7178 | 7908  | 59D5;59D10 | 19179008 | 19283437 | NO         |    |      |      |          |    |       |  |                         |
| Df(2R)Exel7180 | 7909  | 59E3;59F6  | 19431599 | 19573869 | NO         |    |      |      |          |    |       |  |                         |
| Df(2R)BSC659   | 26511 | 59F1;60A2  | 19468319 | 19698923 | NO         |    |      |      |          |    |       |  |                         |
| Df(2R)BSC600   | 25433 | 59F6;60A5  | 19601334 | 19752850 | NO         |    |      |      |          |    |       |  |                         |
| Df(2R)BSC770   | 26867 | 60A13;60B5 | 19836967 | 19934333 | NO         |    |      |      |          |    |       |  |                         |
| Df(2R)BSC356   | 24380 | 60B8;60C4  | 19955762 | 20145427 | NO         |    |      |      |          |    |       |  |                         |
| Df(2R)Exel6082 | 7561  | 60C4;60C7  | 20145420 | 20257300 | NO         |    |      |      |          |    |       |  |                         |
| Df(2R)BSC603   | 25436 | 60C7;60D1  | 20257300 | 20372187 | NO         |    |      |      |          |    |       |  | viable deficiency       |
| Df(2R)BSC604   | 25437 | 60D4;60E11 | 20419696 | 20855955 | NO         |    |      |      |          |    |       |  | discrepancy with BSC607 |
| Df(2R)BSC606   | 25439 | 60D10;60E1 | 20518555 | 20681140 | NO         |    |      |      |          |    |       |  |                         |
| Df(2R)BSC607   | 25440 | 60E4;60E8  | 20762378 | 20836711 | SUPPRESSOR | No | 3.01 | 0.12 | 5.57E-08 | 19 | NKAIN |  |                         |
| Df(2R)BSC608   | 25441 | 60E11;60F2 | 20864281 | 20939897 | NO         |    |      |      |          |    |       |  |                         |

All deficiencies analyzed are listed according to their relative chromosomal position. The cytological location, molecular coordinates and the dominant effect on *dNf1* pupal size (NO – no interaction, SUPPRESSOR, ENHANCER) of each deficiency is given. Female pupal length measurements for deficiencies in the *dNf1* mutant background are provided, together with standard deviations and *p*-values. Modifying deficiencies that were subsequently found to have an effect on wild-type pupal size are indicated (Yes – indicates that a deficiency has a non-specific effect; No – no observed effect on wild-type size; No\* - has an effect on wild-type size, but in the opposite direction from the effect on *dNf1* mutants). Where determined, the responsible gene identified under each modifying deficiency is shown. The final column contains notes describing deficiencies that are viable and those that result in accelerated developmental timing (acc dev). The term discrepancy refers to a non-modifying deficiency that completely overlaps with a modifying deficiency.
