# Supplementary material for: Genetic and Functional Studies Implicate Synaptic Overgrowth and Ring Gland cAMP/PKA Signaling Defects in the Drosophila melanogaster Neurofibromatosis-1 Growth Deficiency
Source: PubMed Central journal article supplement (PMC3836801; doi:10.1371/journal.pgen.1003958), 2013-11-21
Supplement: pgen.1003958.s011.pdf [file pgen.1003958.s011.pdf]

**Table S3.** Growth-related genes uncovered by screened deficiencies.

| <b>Gene</b>    | <b>Uncovered by</b>                 | <b>Reference</b> |
|----------------|-------------------------------------|------------------|
| <i>dAlk</i>    | <i>Df(2R)Exel6064</i>               | [1]              |
| <i>B4</i>      | <i>Df(2L)BSC147; Df(2L)BSC691</i>   | [2]              |
| <i>chico</i>   | <i>Df(2L)BSC206</i>                 | [3]              |
| <i>hpo</i>     | <i>Df(2R)BSC782; Df(2R)BSC828</i>   | [4]              |
| <i>Hr4</i>     | <i>Df(1)BSC590</i>                  | [5]              |
| <i>llp6</i>    | <i>Df(1)ED6574; Df(1)ED11354</i>    | [6,7]            |
| <i>jeb</i>     | <i>Df(2R)BSC199; Df(2R)BSC699</i>   | [1]              |
| <i>Mer</i>     | <i>Df(1)BSC870; Df(1)BSC871</i>     | [8]              |
| <i>mir-8</i>   | <i>Df(2R)Exel7145; Df(2R)ED2747</i> | [9]              |
| <i>Pi3K21B</i> | <i>Df(2L)BSC454</i>                 | [10]             |
| <i>Pten</i>    | <i>Df(2L)BSC206</i>                 | [11]             |
| <i>Ptth</i>    | <i>Df(2L)Exel8003; Df(2L)BSC456</i> | [12]             |
| <i>SNF1A</i>   | <i>Df(1)Exel6227</i>                | [13]             |
| <i>sNPF</i>    | <i>Df(2L)Exel7077</i>               | [14]             |
| <i>step</i>    | <i>Df(2L)ED1446</i>                 | [15]             |
| <i>Tor</i>     | <i>Df(2L)Exel7055</i>               | [16]             |
| <i>ush</i>     | <i>Df(2L)ED40; Df(2L)BSC456</i>     | [9]              |
| <i>yki</i>     | <i>Df(2R)BSC356</i>                 | [17]             |

18 cell, tissue, or systemic growth implicated genes uncovered by analyzed 1<sup>st</sup> and 2<sup>nd</sup> chromosome deficiencies. Among the deficiencies listed, only those that uncovered *dAlk* or *Jeb* modified *dNf1* pupal size.

1. Gouzi JY, Moressis A, Walker JA, Apostolopoulou AA, Palmer RH, et al. (2011) The receptor tyrosine kinase Alk controls neurofibromin functions in *Drosophila* growth and learning. *PLoS genetics* 7: e1002281.
2. Wittwer F, Jaquenoud M, Brogiolo W, Zarske M, Wustemann P, et al. (2005) Susi, a negative regulator of *Drosophila* PI3-kinase. *Developmental cell* 8: 817-827.
3. Bohni R, Riesgo-Escovar J, Oldham S, Brogiolo W, Stocker H, et al. (1999) Autonomous control of cell and organ size by CHICO, a *Drosophila* homolog of vertebrate IRS1-4. *Cell* 97: 865-875.

4. Harvey KF, Pflieger CM, Hariharan IK (2003) The *Drosophila* Mst ortholog, hippo, restricts growth and cell proliferation and promotes apoptosis. *Cell* 114: 457-467.
5. King-Jones K, Charles JP, Lam G, Thummel CS (2005) The ecdysone-induced DHR4 orphan nuclear receptor coordinates growth and maturation in *Drosophila*. *Cell* 121: 773-784.
6. Okamoto N, Yamanaka N, Yagi Y, Nishida Y, Kataoka H, et al. (2009) A fat body-derived IGF-like peptide regulates postfeeding growth in *Drosophila*. *Developmental cell* 17: 885-891.
7. Slaidina M, Delanoue R, Gronke S, Partridge L, Leopold P (2009) A *Drosophila* insulin-like peptide promotes growth during nonfeeding states. *Developmental cell* 17: 874-884.
8. LaJeunesse DR, McCartney BM, Fehon RG (1998) Structural analysis of *Drosophila* merlin reveals functional domains important for growth control and subcellular localization. *The Journal of cell biology* 141: 1589-1599.
9. Jin H, Kim VN, Hyun S (2012) Conserved microRNA miR-8 controls body size in response to steroid signaling in *Drosophila*. *Genes & development* 26: 1427-1432.
10. Weinkove D, Neufeld TP, Twardzik T, Waterfield MD, Leever SJ (1999) Regulation of imaginal disc cell size, cell number and organ size by *Drosophila* class I(A) phosphoinositide 3-kinase and its adaptor. *Current biology* : CB 9: 1019-1029.
11. Goberdhan DC, Paricio N, Goodman EC, Mlodzik M, Wilson C (1999) *Drosophila* tumor suppressor PTEN controls cell size and number by antagonizing the Chico/PI3-kinase signaling pathway. *Genes & development* 13: 3244-3258.
12. McBrayer Z, Ono H, Shimell M, Parvy JP, Beckstead RB, et al. (2007) Prothoracicotropic hormone regulates developmental timing and body size in *Drosophila*. *Developmental cell* 13: 857-871.
13. Bland ML, Lee RJ, Magallanes JM, Foskett JK, Birnbaum MJ (2010) AMPK supports growth in *Drosophila* by regulating muscle activity and nutrient uptake in the gut. *Developmental biology* 344: 293-303.
14. Lee KS, You KH, Choo JK, Han YM, Yu K (2004) *Drosophila* short neuropeptide F regulates food intake and body size. *The Journal of biological chemistry* 279: 50781-50789.
15. Fuss B, Becker T, Zinke I, Hoch M (2006) The cytohesin Steppke is essential for insulin signalling in *Drosophila*. *Nature* 444: 945-948.
16. Zhang H, Stallock JP, Ng JC, Reinhard C, Neufeld TP (2000) Regulation of cellular growth by the *Drosophila* target of rapamycin dTOR. *Genes & development* 14: 2712-2724.
17. Huang J, Wu S, Barrera J, Matthews K, Pan D (2005) The Hippo signaling pathway coordinately regulates cell proliferation and apoptosis by inactivating Yorkie, the *Drosophila* Homolog of YAP. *Cell* 122: 421-434.
