# Supplementary material for: Genetic and Functional Studies Implicate Synaptic Overgrowth and Ring Gland cAMP/PKA Signaling Defects in the Drosophila melanogaster Neurofibromatosis-1 Growth Deficiency
Source: PubMed Central journal article supplement (PMC3836801; doi:10.1371/journal.pgen.1003958), 2013-11-21
Supplement: pgen.1003958.s012.pdf [file pgen.1003958.s012.pdf]

**Table S4.** Larval tissue expression patterns of Gal4 drivers

| Gal4            | Major Larval Expression                 | Salivary gland | Fat body    | Gut                 | Ring gland  | Imaginal discs | Malpighian tubule | Trachea     | Larval expression also in: |
|-----------------|-----------------------------------------|----------------|-------------|---------------------|-------------|----------------|-------------------|-------------|----------------------------|
| <i>Ac5C</i>     | Ubiquitous                              | X              | X           | X                   | X           | X              | X                 | X           |                            |
| <i>elav</i>     | Pan-neuronal (not in RG)                |                |             |                     |             |                |                   |             | none                       |
| <i>Ras2(41)</i> | CNS                                     | X              | X<br>(weak) | X<br>(weak)         |             |                |                   |             |                            |
| <i>Ras2(19)</i> | CNS                                     | X              | X<br>(weak) | X<br>(weak)         | X<br>(weak) | X<br>(weak)    |                   |             |                            |
| <i>n-syb</i>    | Pan-neuronal                            |                |             |                     |             |                |                   |             | none                       |
| <i>C23</i>      | CNS: subset of neurons, MB              | X              | X<br>(weak) |                     |             |                |                   |             |                            |
| <i>386Y</i>     | Peptidergic neurons                     | X              |             |                     |             |                |                   |             |                            |
| <i>MB241</i>    | MB                                      | X              |             | X<br>(midgut)       |             |                |                   |             |                            |
| <i>TH</i>       | Dopaminergic neurons                    | X              |             |                     |             |                | X                 |             | PV and cuticle             |
| <i>Repo</i>     | Glia                                    | X              |             |                     |             |                |                   |             |                            |
| <i>Ilp2</i>     | Insulin producing cells in CNS          | X              |             |                     |             |                |                   |             |                            |
| <i>P0206</i>    | PG, CA (weak)                           | X              |             | X (gut histoblasts) |             |                |                   |             |                            |
| <i>Mai60</i>    | PG (weak)                               | X              |             |                     |             |                |                   |             | central brain (weak)       |
| <i>Feb36</i>    | PG, CA                                  | X              | X<br>(weak) | X<br>(weak)         |             |                | X<br>(weak)       | X<br>(weak) |                            |
| <i>Aug21</i>    | CA, Tv neurons in the thoracic ganglion | X              |             |                     |             |                |                   |             |                            |
| <i>Akh</i>      | CC                                      |                |             |                     |             |                |                   |             | none                       |
| <i>Feb211</i>   | PG innervating NSNs                     | X              |             |                     |             |                |                   |             |                            |
| <i>Kurs21</i>   | CA-innervating neurons                  | X              |             |                     |             | X (eye)        |                   |             |                            |
| <i>Kurs58</i>   | PI-2 neurons                            | X              |             |                     |             |                |                   |             |                            |
| <i>Mai301</i>   | CNS: 6 NSNs in PI                       |                |             |                     |             |                |                   |             | cuticle                    |
| <i>Mai369</i>   | CNS: 7 lateral NSNs innervating the CC  | X              | X<br>(weak) |                     |             |                |                   |             |                            |

|              |                                                   |   |             |   |  |          |  |                                        |
|--------------|---------------------------------------------------|---|-------------|---|--|----------|--|----------------------------------------|
| <i>Okt30</i> | CC-MS 2                                           | X |             |   |  |          |  |                                        |
| <i>Cg</i>    | Fat body                                          |   | X           |   |  |          |  | hemocyte,<br>anterior lymph gland pair |
| <i>Lsp2</i>  | Fat body                                          |   | X<br>(weak) |   |  |          |  | none                                   |
| <i>BO</i>    | L1 oenocytes                                      |   |             |   |  |          |  | none                                   |
| <i>esg</i>   | Midgut: intestinal stem cells<br>and enteroblasts | X |             | X |  | X (wing) |  |                                        |
| <i>myo1A</i> | Gut: mature enterocytes                           | X |             | X |  | X        |  |                                        |
| <i>Byn</i>   | Posterior gut                                     | X |             | X |  |          |  |                                        |

List of Gal4 driver lines used in this study and their expression patterns in third instar larvae as determined by crossing Gal4 drivers to *UAS-GFP*, or from published data. Abbreviations: Ring gland (RG), central nervous system (CNS), mushroom body (MB), prothoracic gland (PG), corpora allata (CA), corpora cardiaca (CC), neurosecretory neurons (NSNs), pars intercerebralis neurons (PI), corpora cardiaca innervating neurosecretory neuron of the medial subesophageal ganglion 2 (CC-MS 2), proventriculus (PV), fat body (FB), salivary glands (SG), imaginal discs (IDs), first instar (L1).
