# Supplementary material for: Genetic and Functional Studies Implicate Synaptic Overgrowth and Ring Gland cAMP/PKA Signaling Defects in the Drosophila melanogaster Neurofibromatosis-1 Growth Deficiency
Source: PubMed Central journal article supplement (PMC3836801; doi:10.1371/journal.pgen.1003958), 2013-11-21
Supplement: pgen.1003958.s013.pdf [file pgen.1003958.s013.pdf]

**Table S5** Identification of tissues that require *dNf1* or cAMP/PKA signaling for growth regulation.

| Gal4                  | UAS- <i>dNf1</i>                 | <i>dnc v18140</i>                | <i>dnc v14534</i>          | <i>dnc v107967</i>               | 2xUAS- <i>PKA*</i>               | 3xUAS- <i>PKA*</i>               | 4xUAS- <i>PKA*</i>               | 5xUAS- <i>PKA*</i>                     |
|-----------------------|----------------------------------|----------------------------------|----------------------------|----------------------------------|----------------------------------|----------------------------------|----------------------------------|----------------------------------------|
| <i>Act5C</i>          | <i>Rescue</i>                    | †                                | <i>Rescue</i><br>(pupal †) | <i>Rescue</i><br>(pupal †)       | Sub-viable                       | †                                | †                                | †                                      |
| <i>elav</i>           | <i>Rescue</i>                    | NR                               | NR                         | NR                               | NR                               | NR                               | NR                               | †                                      |
| <i>elav+Dcr-2</i>     | <i>Rescue</i>                    | NR                               | NR                         | NR                               | n/a                              | n/a                              | n/a                              | n/a                                    |
| <i>Ras2(41)</i>       | <i>Rescue</i>                    | NR                               | NR                         | NR                               | NR*                              | NR*                              | Early †                          | †                                      |
| <i>Ras2(19)</i>       | <i>Rescue</i>                    | NR                               | NR                         | NR                               | NR*                              | NR*                              | NR (pupal †)                     | †                                      |
| <i>Ras2(41)+Dcr-2</i> | <i>Rescue</i>                    | NR                               | NR                         | NR                               | n/a                              | n/a                              | n/a                              | n/a                                    |
| <i>C23</i>            | <i>Rescue</i>                    | NR                               | NR                         | NR                               | NR*                              | NR                               | NR (pupal †)                     | †                                      |
| <i>386Y</i>           | <i>Rescue</i><br>( <i>weak</i> ) | NR                               | NR                         | NR                               | NR                               | NR                               | NR                               | †                                      |
| <i>MB241</i>          | NR                               | NR                               | NR                         | NR                               | NR                               | NR                               | NR                               | NR                                     |
| <i>TH</i>             | NR                               | NR                               | NR                         | NR                               | NR                               | NR                               | NR                               | †                                      |
| <i>repo</i>           | NR                               | NR                               | NR                         | NR                               | NR                               | NR                               | NR                               | †                                      |
| <i>Ilp2</i>           | NR                               | NR                               | NR                         | NR                               | NR                               | NR (sick)                        | †                                | †                                      |
| <i>P0206</i>          | NR                               | NR                               | NR                         | NR                               | NR                               | NR                               | NR (sick)                        | sick                                   |
| <i>Mai60</i>          | NR                               | NR                               | NR                         | NR                               | NR                               | NR                               | NR                               | †                                      |
| <i>Feb36</i>          | NR                               | <i>Rescue</i><br>(pupal †)       | Sick/†                     | <i>Rescue</i>                    | NR                               | <i>Rescue</i><br>( <i>weak</i> ) | †                                | †                                      |
| <i>Aug21</i>          | NR                               | <i>Rescue</i><br>( <i>weak</i> ) | NR                         | <i>Rescue</i><br>( <i>weak</i> ) | <i>Rescue</i><br>( <i>weak</i> ) | <i>Rescue</i><br>( <i>weak</i> ) | <i>Rescue</i><br>( <i>weak</i> ) | †                                      |
| <i>Akh</i>            | NR                               | <i>Rescue</i>                    | <i>Rescue</i>              | <i>Rescue</i>                    | <i>Rescue</i>                    | <i>Rescue</i>                    | <i>Rescue</i>                    | <i>Rescue</i><br>( <i>sub-viable</i> ) |
| <i>Feb211</i>         | NR                               | NR                               | NR                         | NR                               | NR                               | NR                               | NR                               | NR                                     |
| <i>Kurs21</i>         | NR                               | NR                               | NR                         | NR                               | NR                               | NR                               | NR                               | NR (very sick)                         |
| <i>Kurs58</i>         | NR                               | NR                               | NR                         | NR                               | NR                               | NR                               | NR                               | NR                                     |
| <i>Mai301</i>         | NR                               | NR                               | NR                         | NR                               | NR                               | NR                               | †                                | †                                      |
| <i>Mai369</i>         | NR                               | NR                               | NR                         | NR                               | NR                               | NR                               | NR                               | †                                      |
| <i>Okt30</i>          | NR                               | NR                               | NR                         | NR                               | NR                               | NR                               | NR                               | n/d                                    |
| <i>Cg</i>             | NR                               | NR                               | NR                         | NR                               | NR                               | NR                               | NR                               | †                                      |
| <i>Lsp2</i>           | NR                               | NR                               | NR                         | NR                               | NR                               | NR                               | NR                               | †                                      |
| <i>BO</i>             | NR                               | NR                               | NR                         | NR                               | NR                               | NR                               | NR                               | NR                                     |
| <i>esg</i>            | NR                               | NR                               | NR                         | NR                               | NR                               | NR                               | NR                               | NR<br>(subviable)                      |

|                     |    |    |    |    |    |           |              |              |
|---------------------|----|----|----|----|----|-----------|--------------|--------------|
| <b><i>myoA1</i></b> | NR | NR | NR | NR | NR | NR        | NR           | †            |
| <b><i>Byn</i></b>   | NR | NR | NR | NR | NR | NR (sick) | NR (pupal †) | NR (pupal †) |

Various Gal4 drivers in the *dNf1* background were crossed to *dNf1* mutants bearing attenuated *UAS-PKA\** transgenes or *dnc* RNAi lines. Rescue was assessed by measuring pupae, followed by genotyping adult flies upon eclosion. All crosses produced viable adults unless otherwise stated.

† denotes lethality; NR non-rescue; NR\* denotes non-rescue with adult eclosers with unfurled wings; n/a not applicable; n/d not determined.
